# Supplementary material for: Clinicopathologic characteristics of EGFR, KRAS, and ALK alterations in 6,595 lung cancers
Source: PubMed Central journal article supplement (PMC5029670; doi:10.18632/oncotarget.8074), 2016-03-14
Supplement: oncotarget-07-23874-s001.pdf [file oncotarget-07-23874-s001.pdf]

## Clinicopathologic characteristics of *EGFR*, *KRAS*, and *ALK* alterations in 6,595 lung cancers

### SUPPLEMENTARY FIGURES AND TABLES

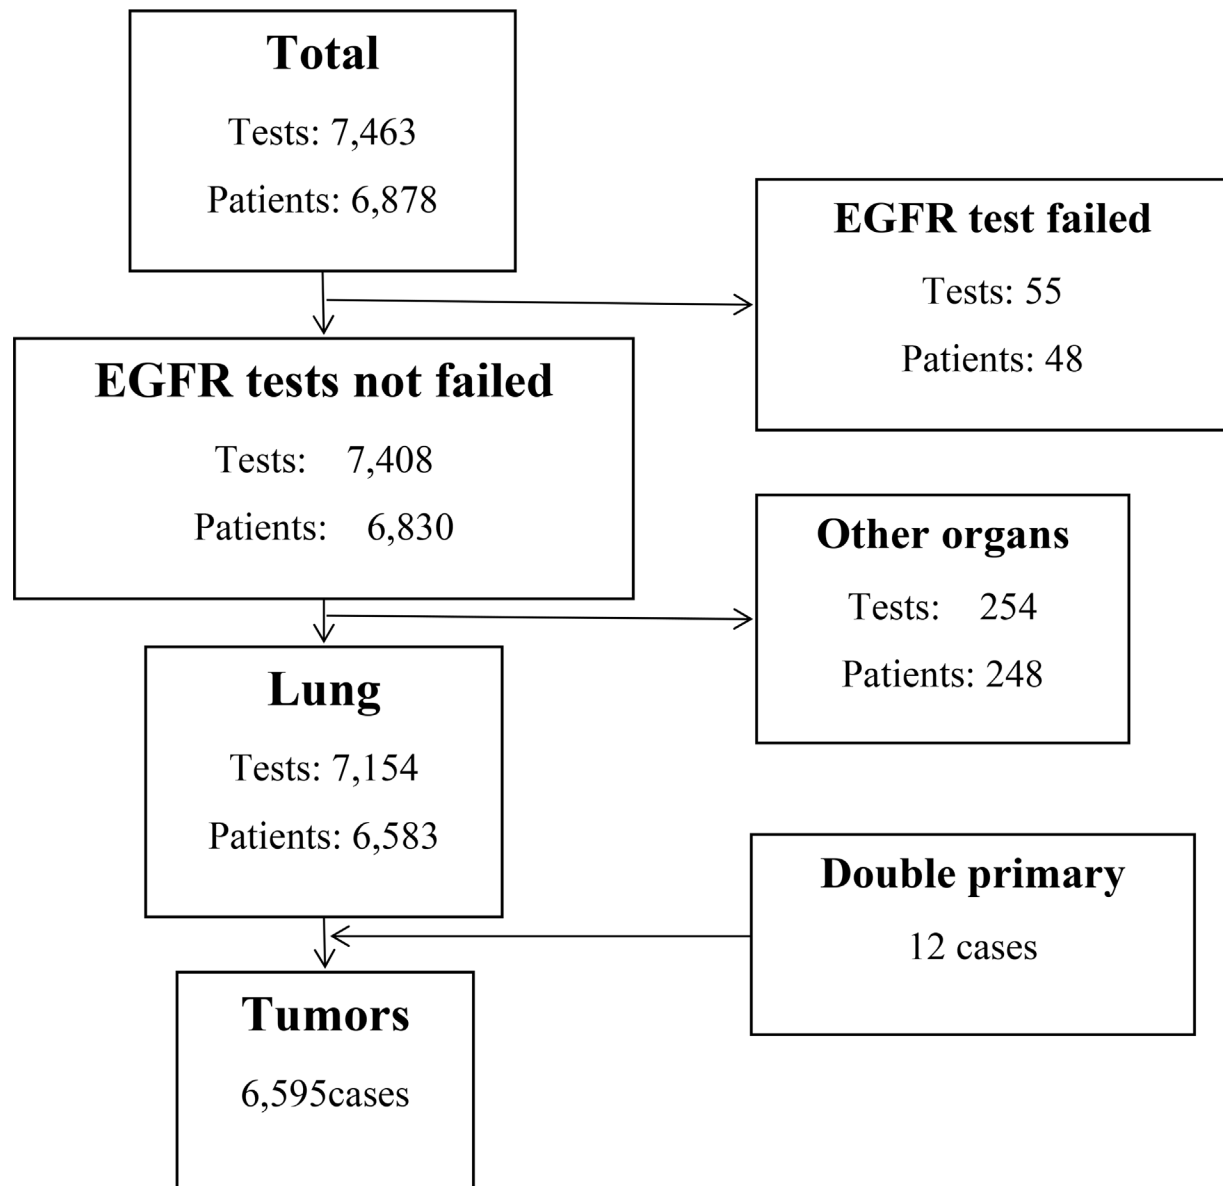

**Supplementary Figure S1: Number of tests and patients being analyzed.** A total of 7,154 *EGFR* tests and 6,595 tumors were analyzed.

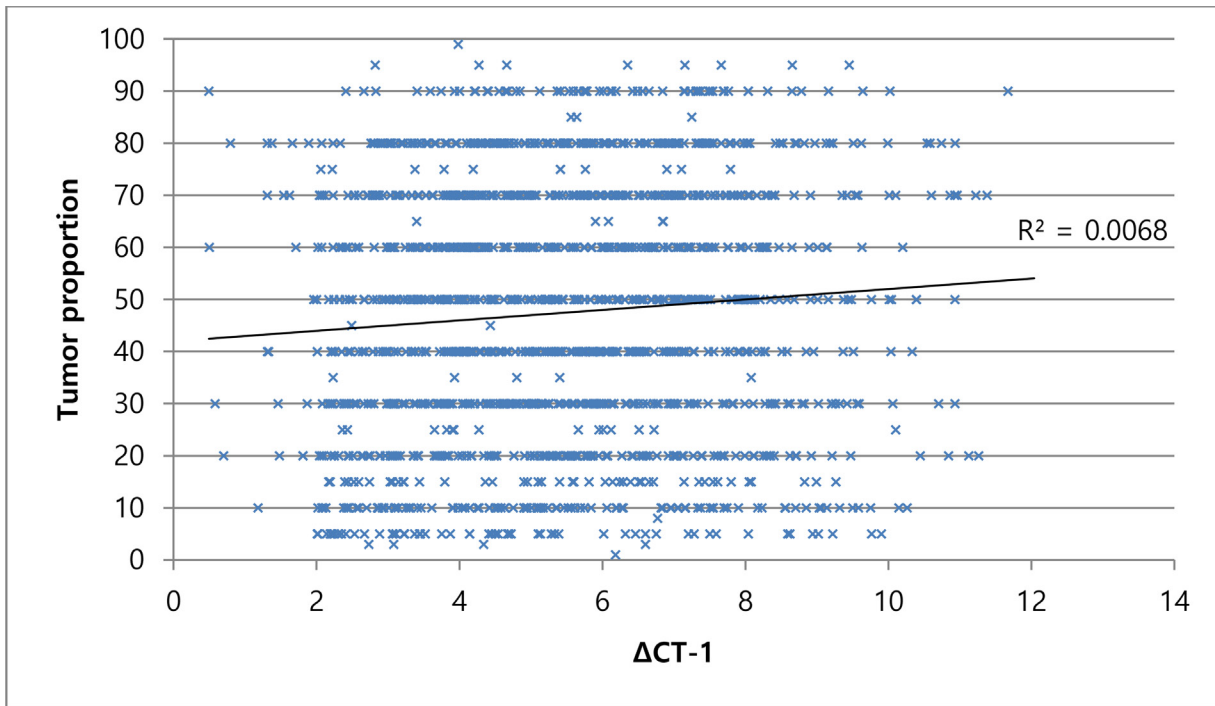

**Supplementary Figure S2a: Relationship between  $\Delta CT-1$  and tumor proportion in the test specimen.** There is a weak positive correlation between  $\Delta CT-1$  and tumor proportion.

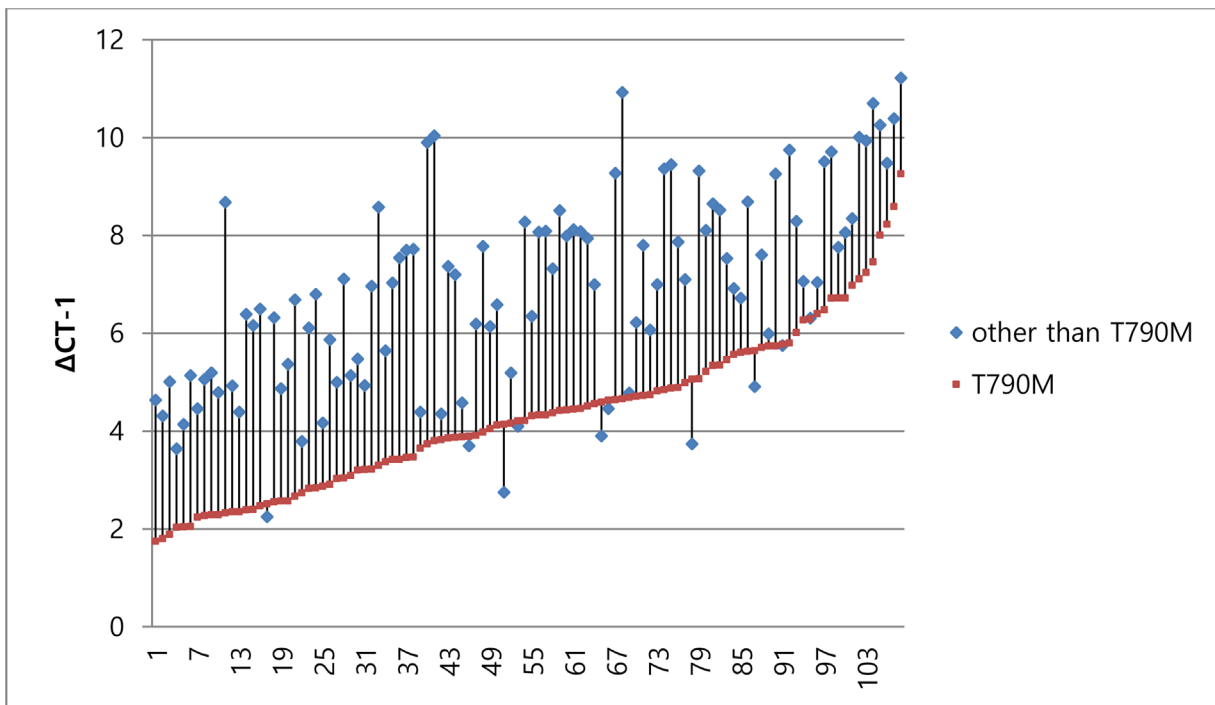

**Supplementary Figure S2b:  $\Delta CT-1$  of T790M and coexisting *EGFR* mutations.**  $\Delta CT-1$  of T790M is generally lower than that of coexisting *EGFR* mutations

Supplementary Figure S3: Association between clinicopathologic features and *EGFR* mutation.

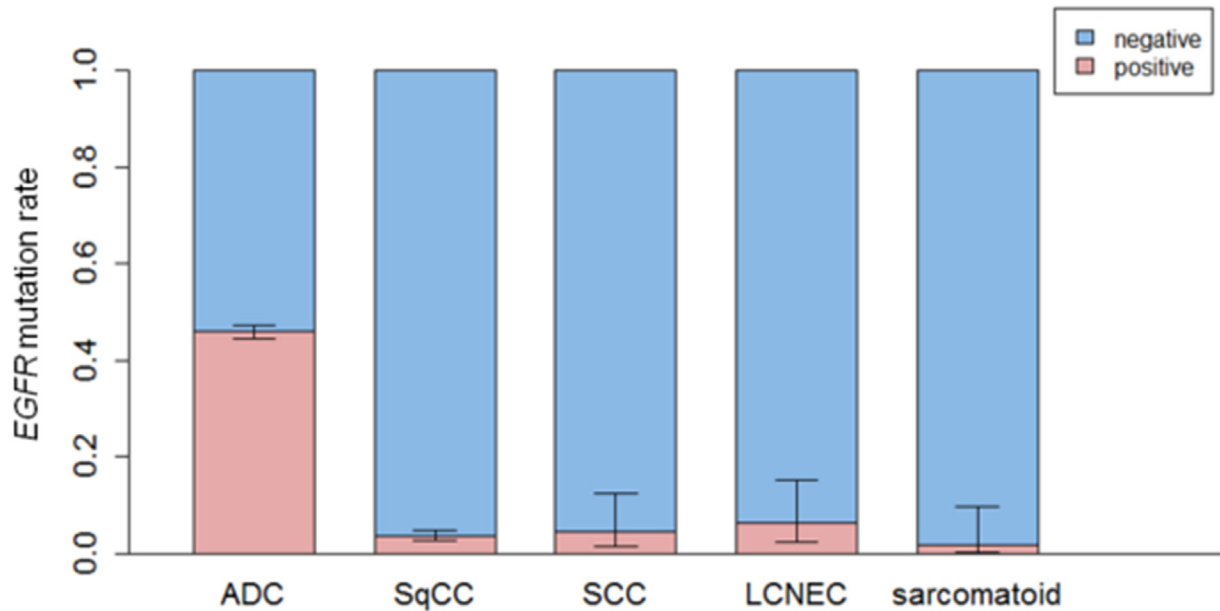

Supplementary Figure S3a: Histologic types of lung cancer and *EGFR* mutation rate. *EGFR* mutation is mostly present in adenocarcinoma. Other histologic types of tumor also have small percentage of *EGFR* mutation.

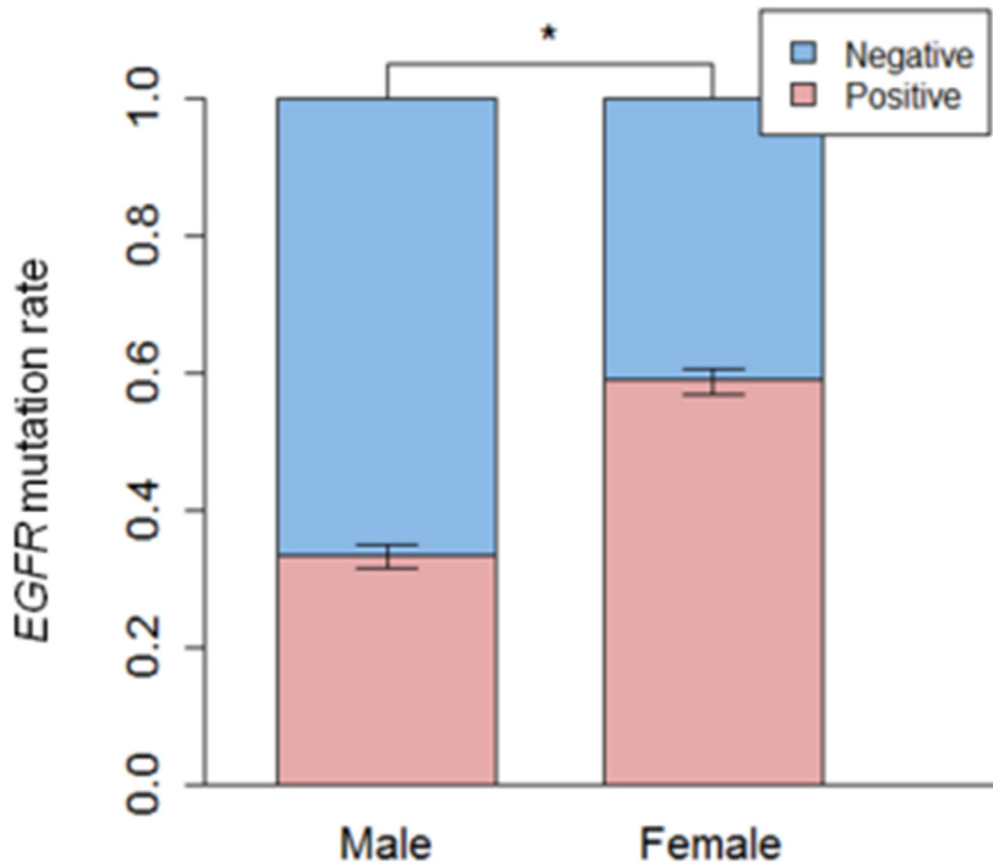

Supplementary Figure S3b: Sex and *EGFR* mutation rate. *EGFR* mutations are frequent in female patient

(Continued)

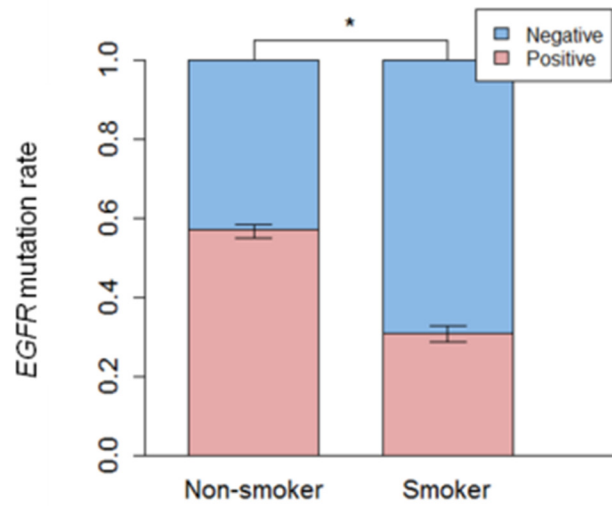

Supplementary Figure S3c: Smoking history and *EGFR* mutation rate. *EGFR* mutations are frequent in non-smoker.

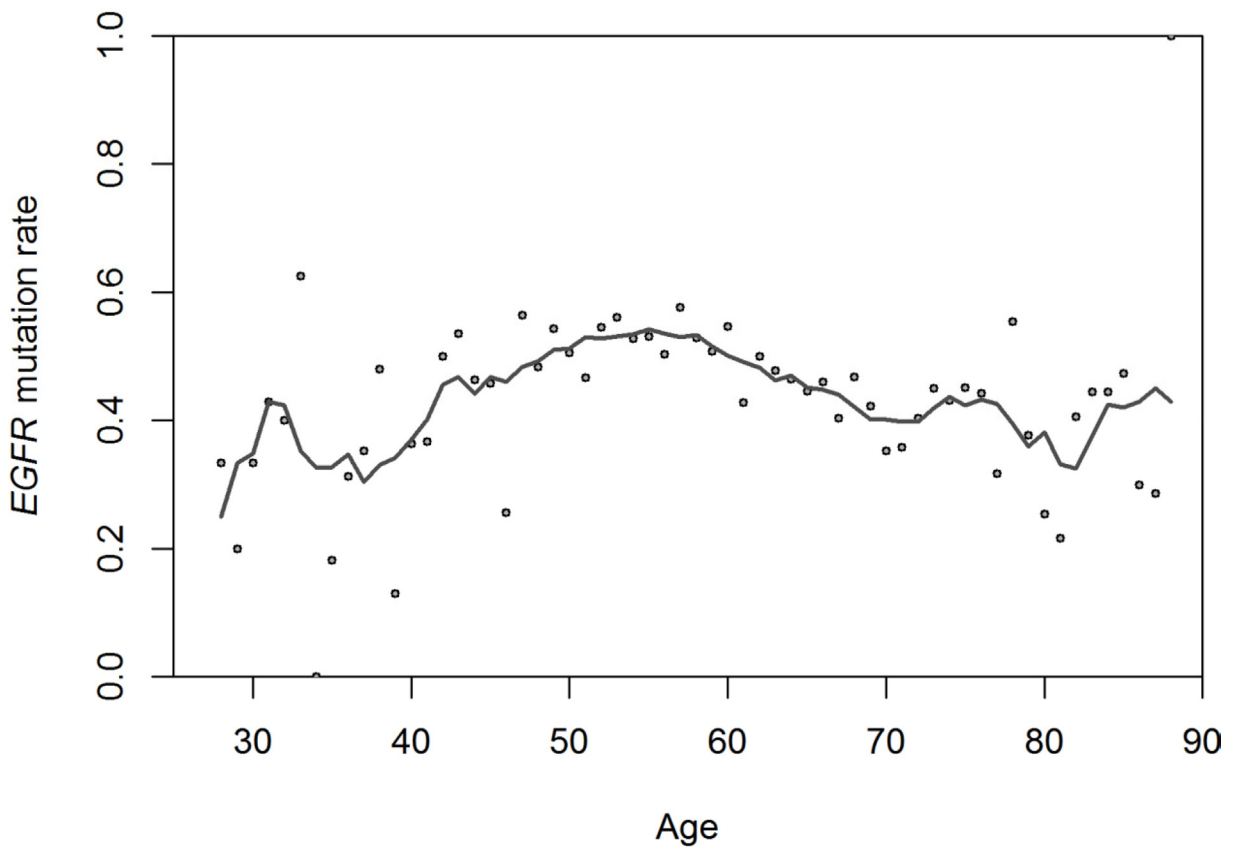

Supplementary Figure S3d: Age of patients and *EGFR* mutation rate. Dots represent *EGFR* mutation proportion at specific ages. The line represents the moving average trend of *EGFR* mutation proportion. The proportion of *EGFR* mutation is highest between 40 and 65 years of age.

(Continued)

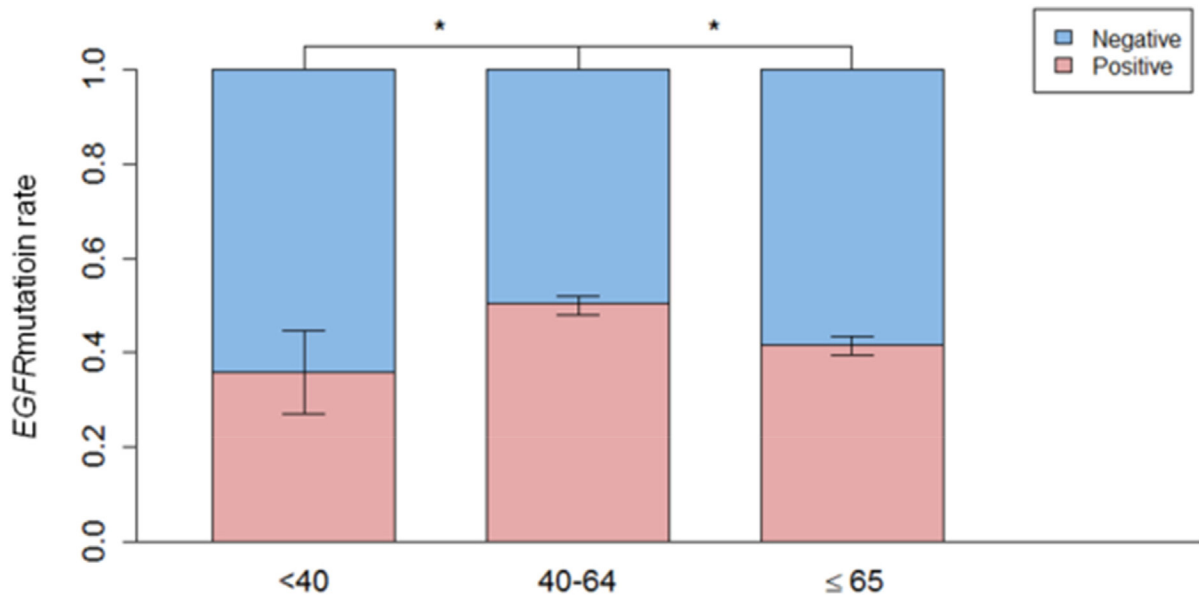

Supplementary Figure S3e: Age group and *EGFR* mutation rate. *EGFR* mutations are frequent in age between 40 and 64.

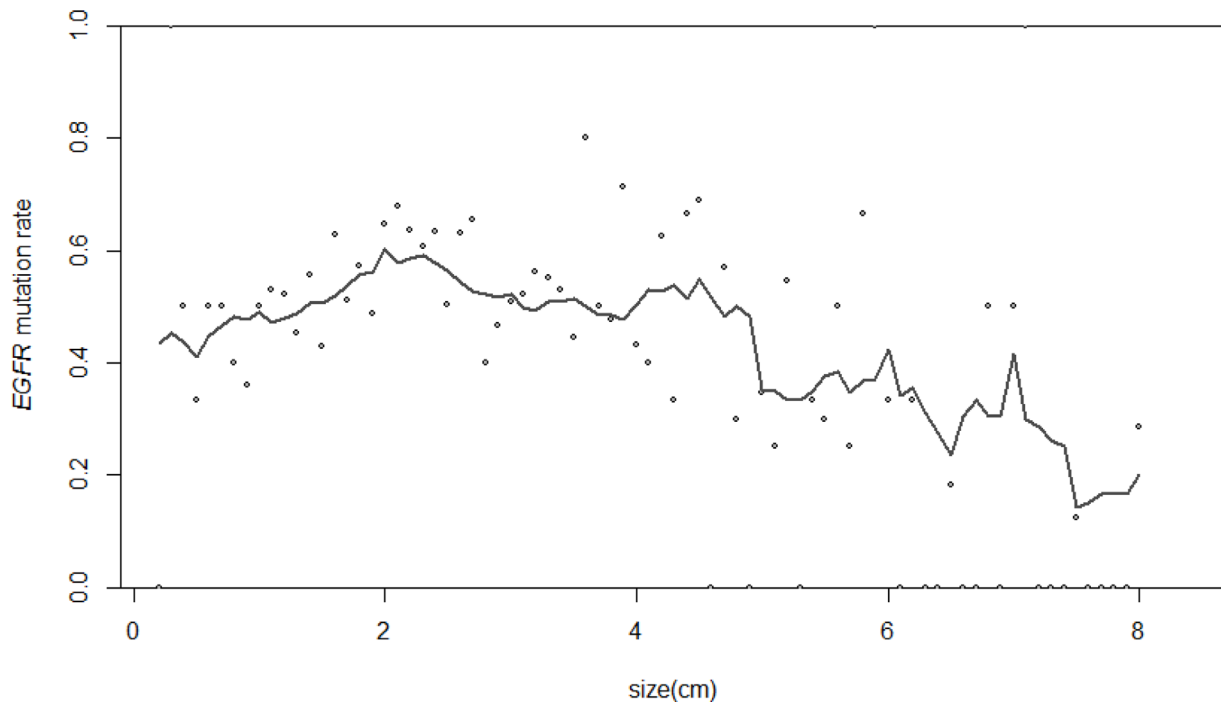

Supplementary Figure S3f: Tumor size and *EGFR* mutation rate. Dot represents proportion of *EGFR* mutation at certain age. Line represents moving average trend line of *EGFR* mutation proportion. *EGFR* mutations are less frequent in large-sized tumor.

(Continued)

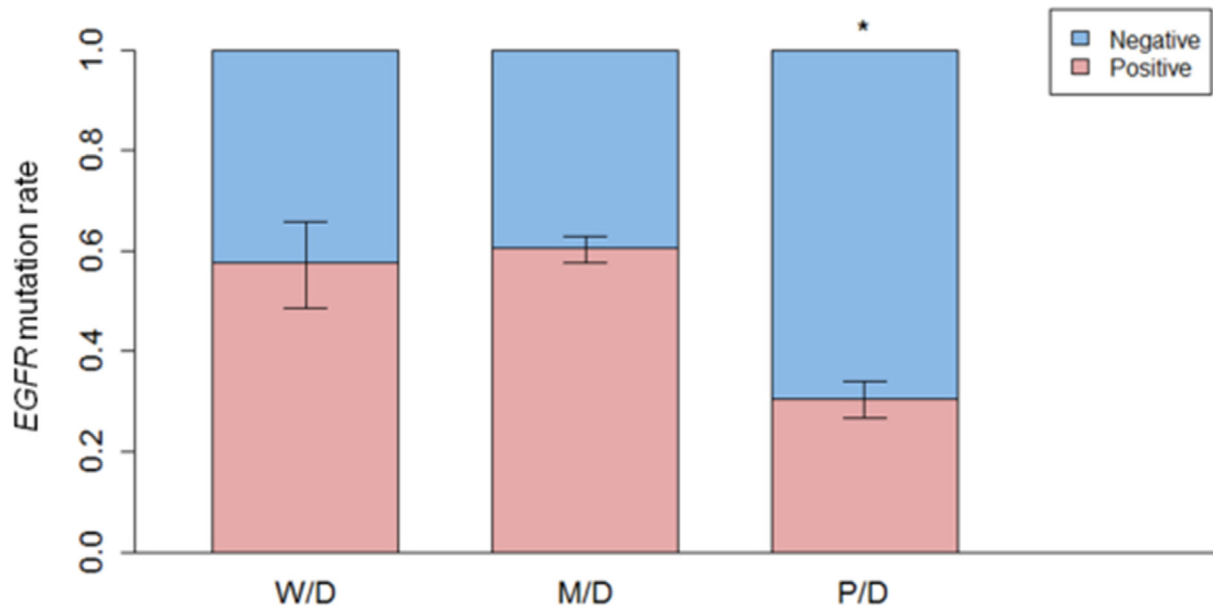

**Supplementary Figure S3g: Tumor differentiation and EGFR mutation rate.** EGFR mutations are less frequent in poorly differentiated tumor.

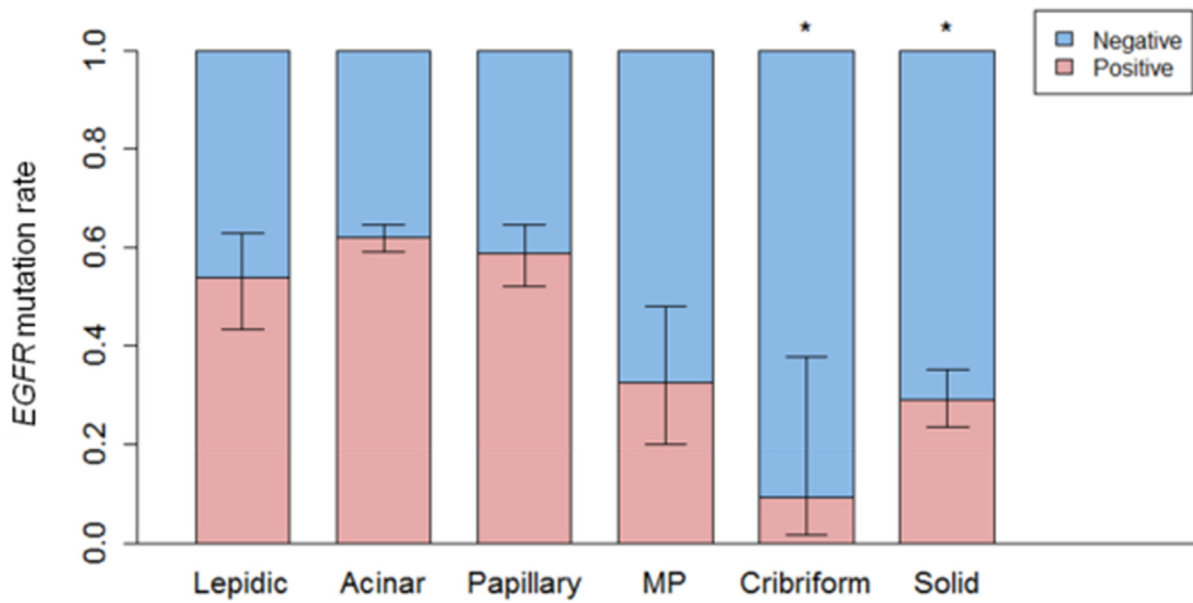

**Supplementary Figure S3h: Primary pattern and EGFR mutation rate.** EGFR mutations are less frequent in cribriform or solid pattern.

(Continued)

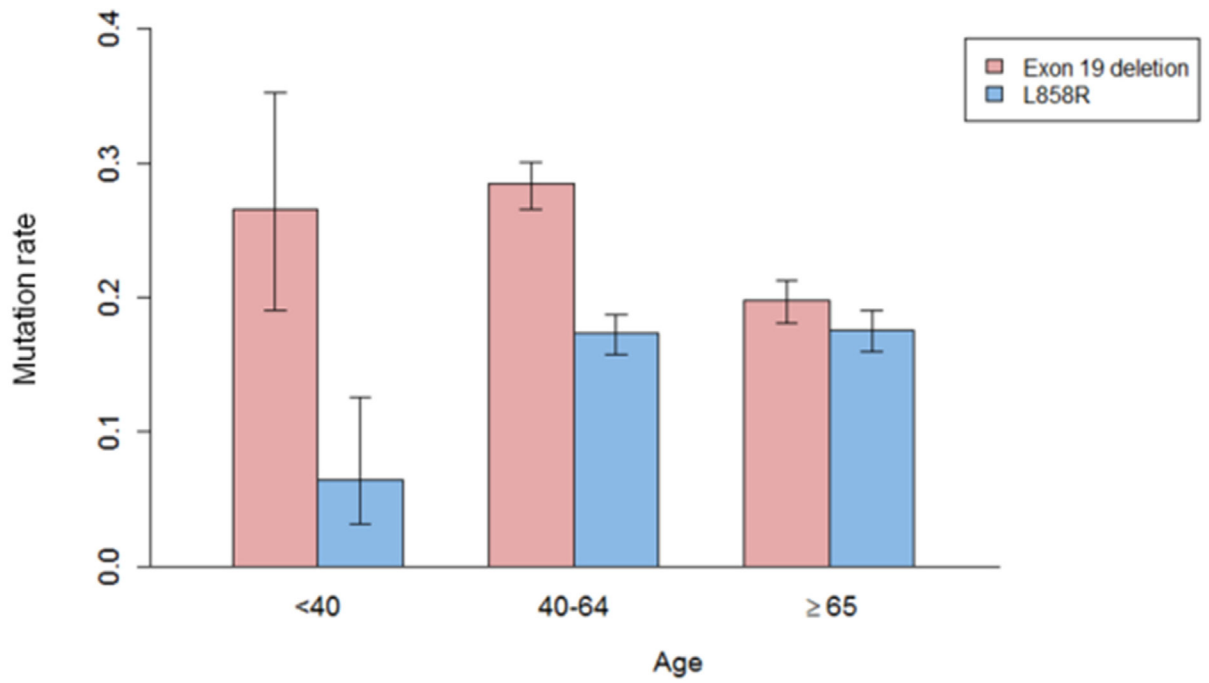

**Supplementary Figure S3i: Age group and subtypes of *EGFR* mutation rate.** Exon 19 deletions are frequent in age less than 65 years. L858R mutations are frequent in age more than 39 years.

Supplementary Figure S4: Association between clinicopathologic features and *KRAS* mutation.

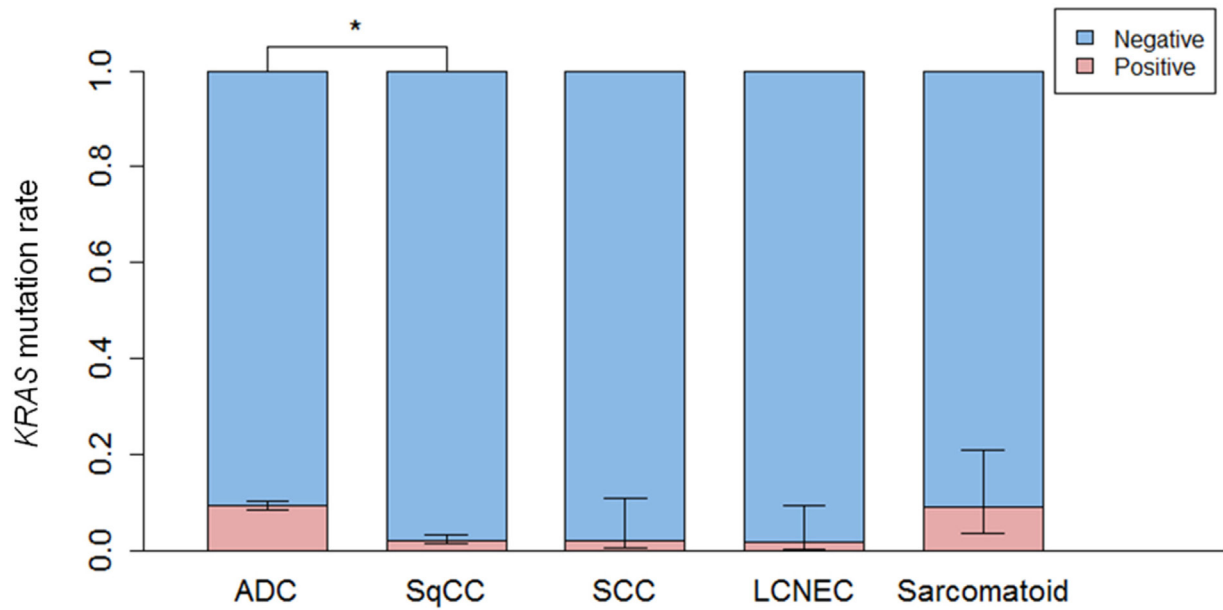

Supplementary Figure S4a: Histologic types of lung cancer and *KRAS* mutation rate. *KRAS* mutations are frequent in adenocarcinoma.

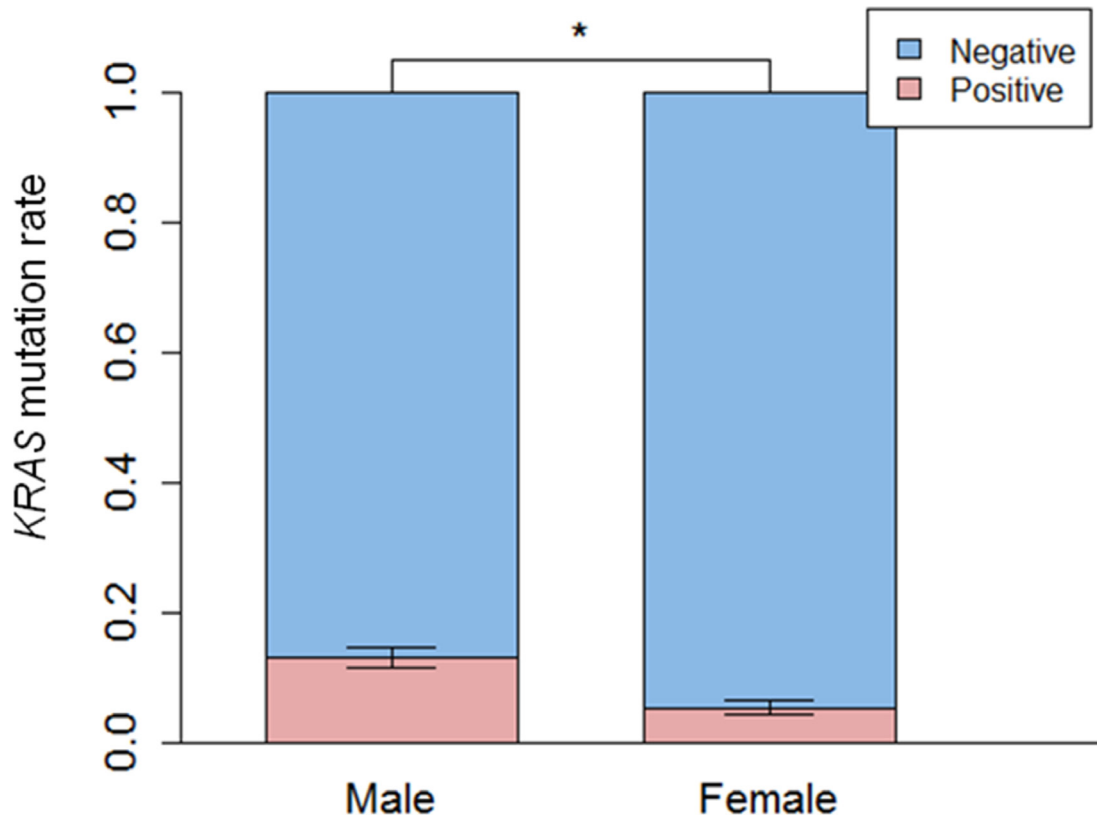

Supplementary Figure S4b: Sex and *KRAS* mutation rate. *KRAS* mutations are frequent in male patient.

(Continued)



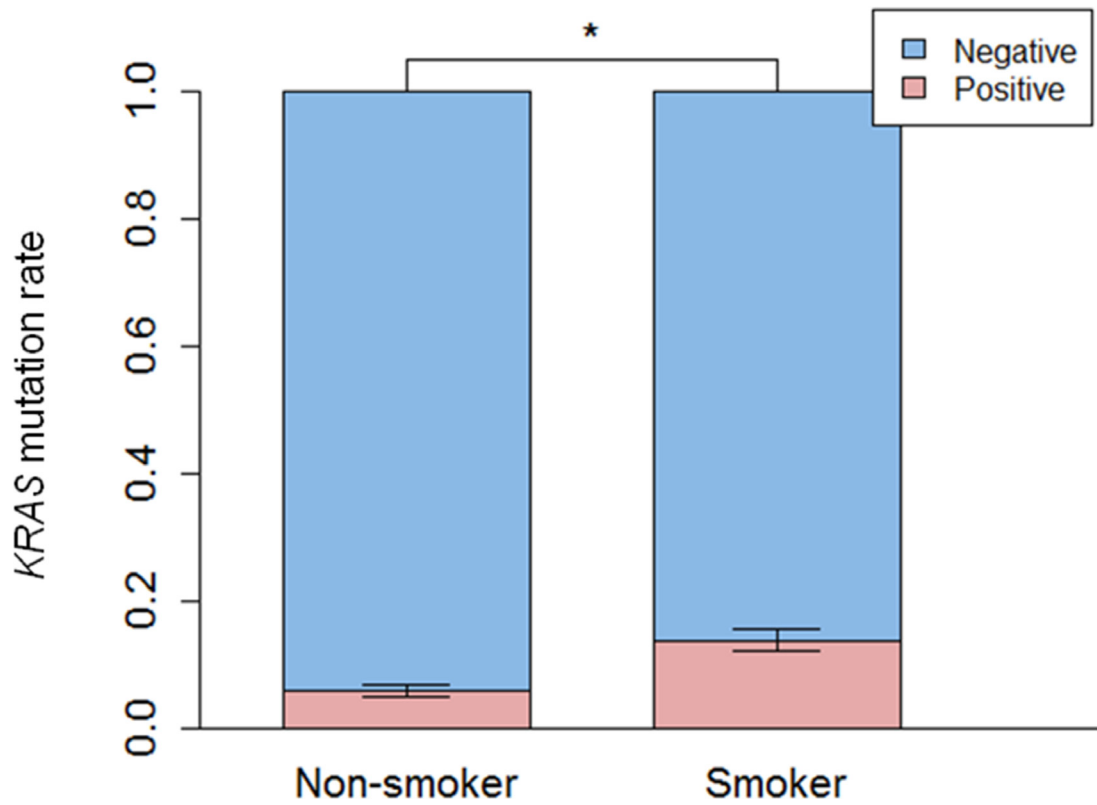

Supplementary Figure S4c: Smoking history and *KRAS* mutation rate. *KRAS* mutations are frequent in smoker.

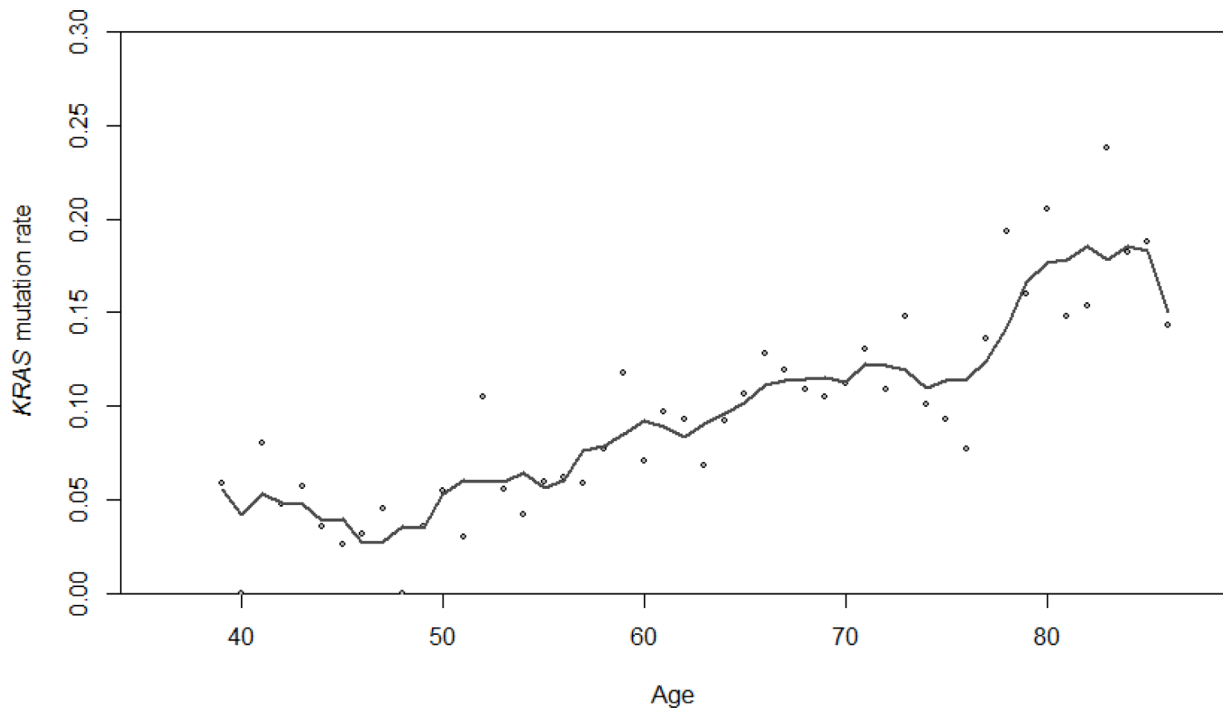

Supplementary Figure S4d: Age and *KRAS* mutation rate. *KRAS* mutations are frequent in older patient.

(Continued)

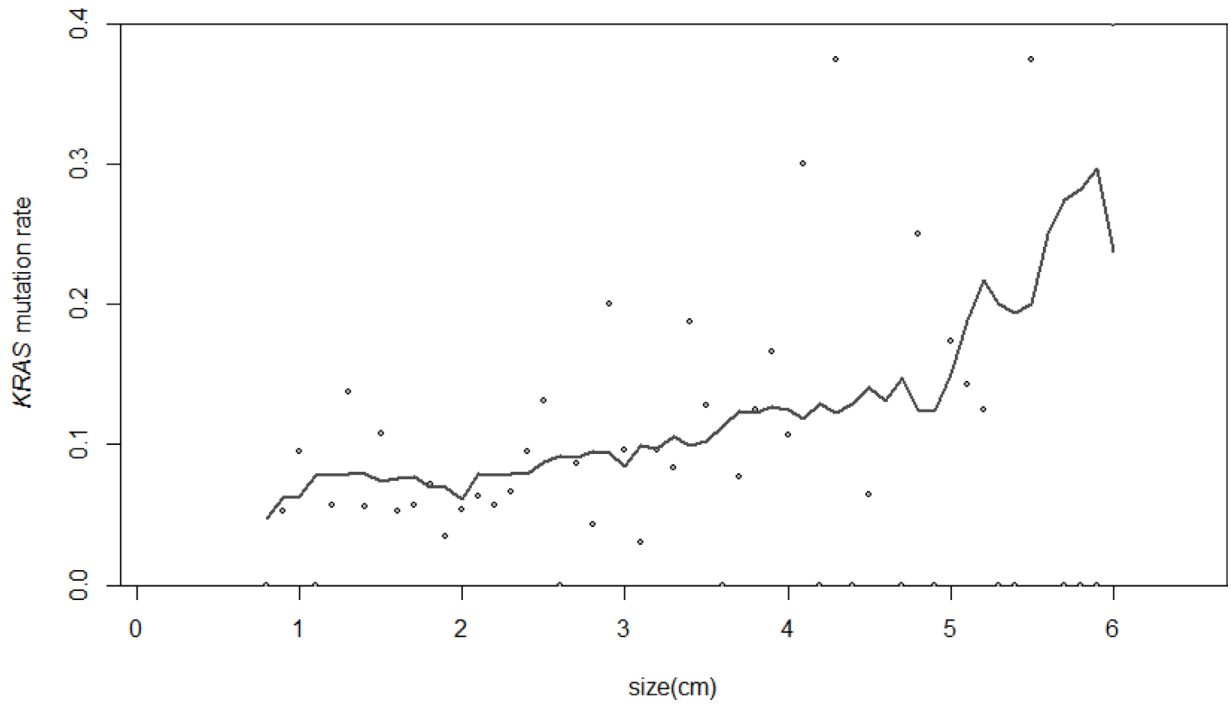

Supplementary Figure S4e: Tumor size and *KRAS* mutation rate. Dots represent *KRAS* mutations are frequent in large-sized tumor.

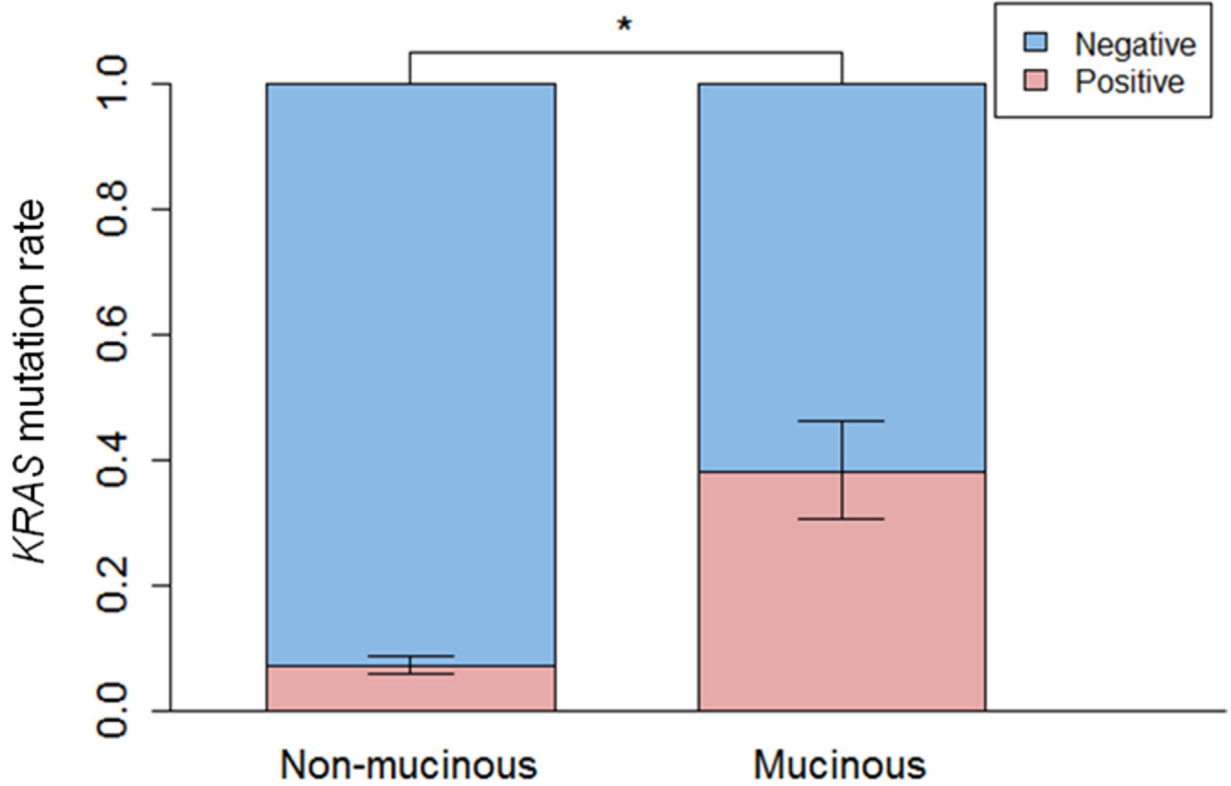

Supplementary Figure S4f: Mucinous type and *KRAS* mutation rate. *KRAS* mutations are frequent in mucinous type.

(Continued)

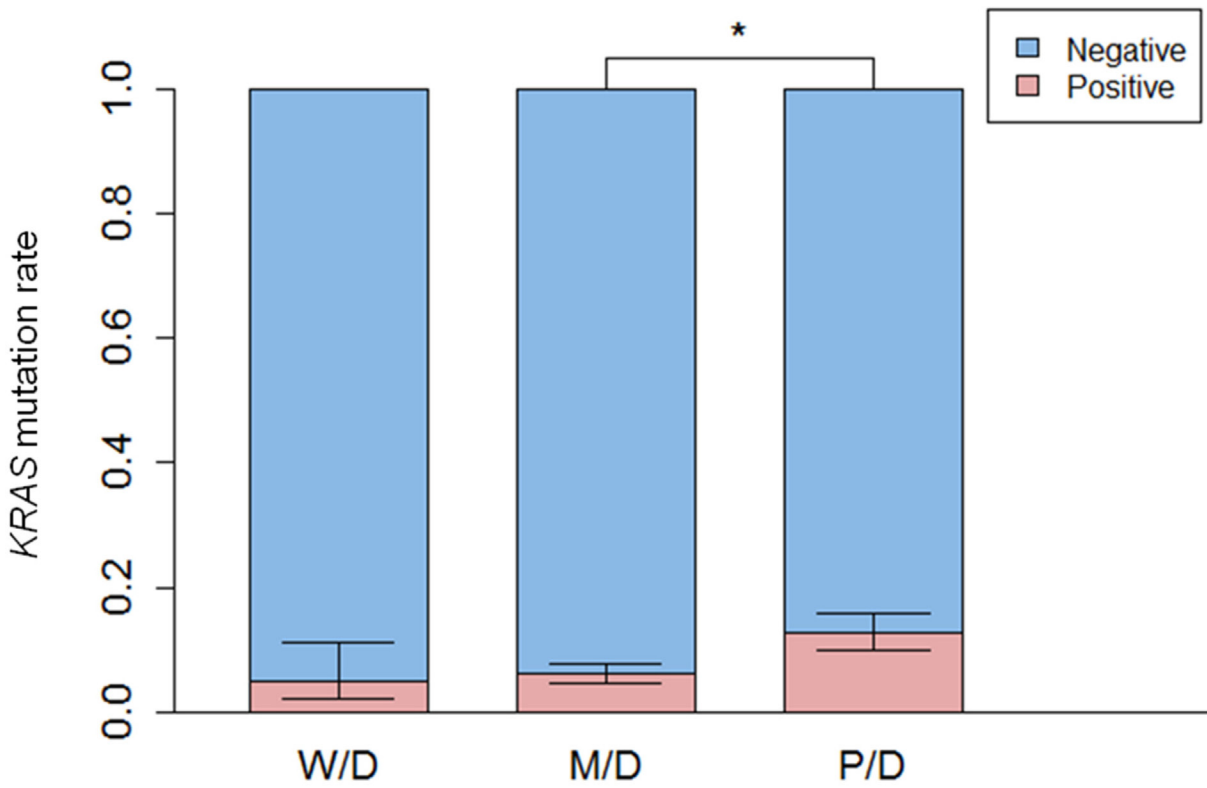

**Supplementary Figure S4g: Tumor differentiation and *KRAS* mutation rate.** *KRAS* mutations are frequent in poorly differentiated tumor.

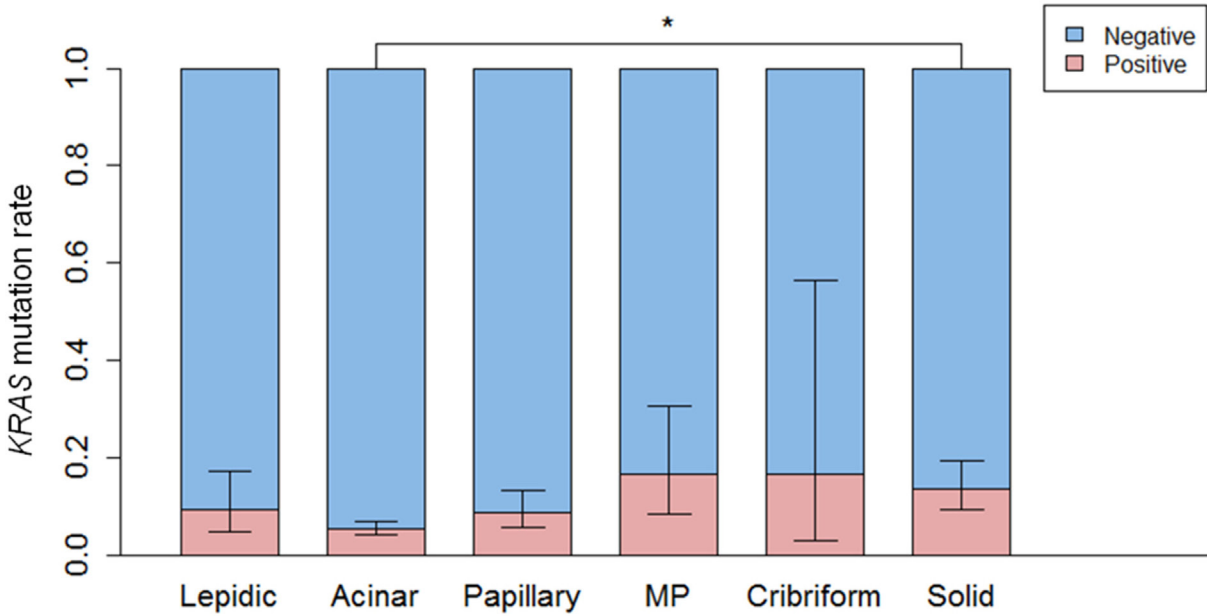

**Supplementary Figure S4h: Primary histologic pattern and *KRAS* mutation rate.** *KRAS* mutations are frequent in solid pattern.

(Continued)

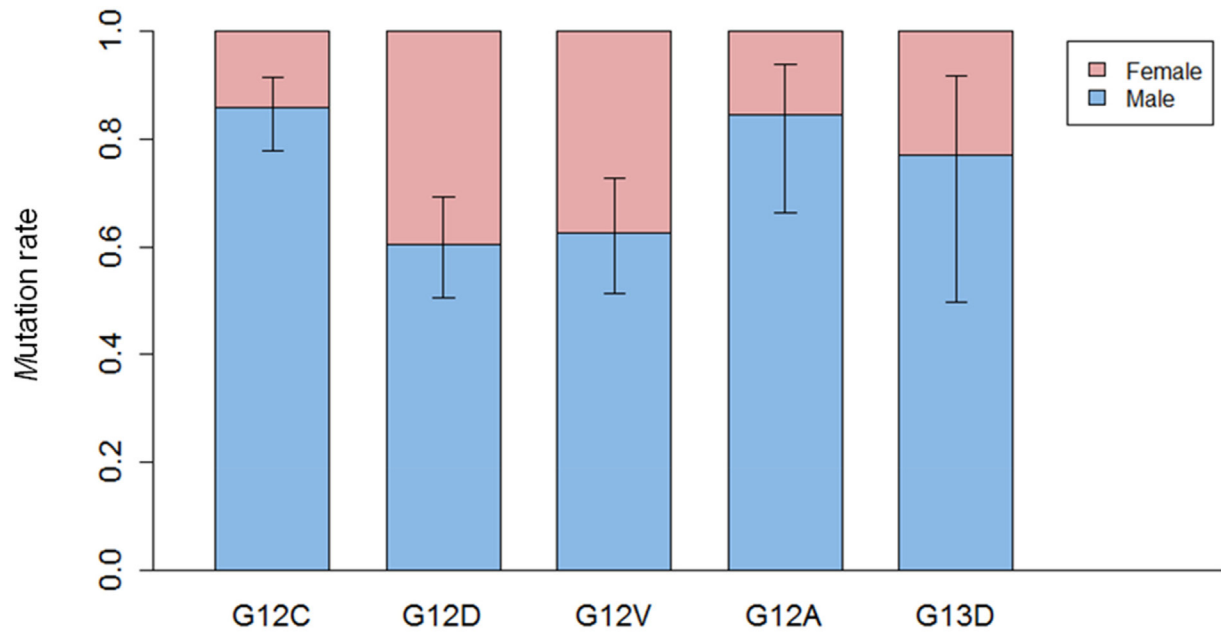

**Supplementary Figure S4i: Subtypes of *KRAS* mutation and sex ratio.** G12C mutations are more frequent in male patient than G12D or G12V mutations.

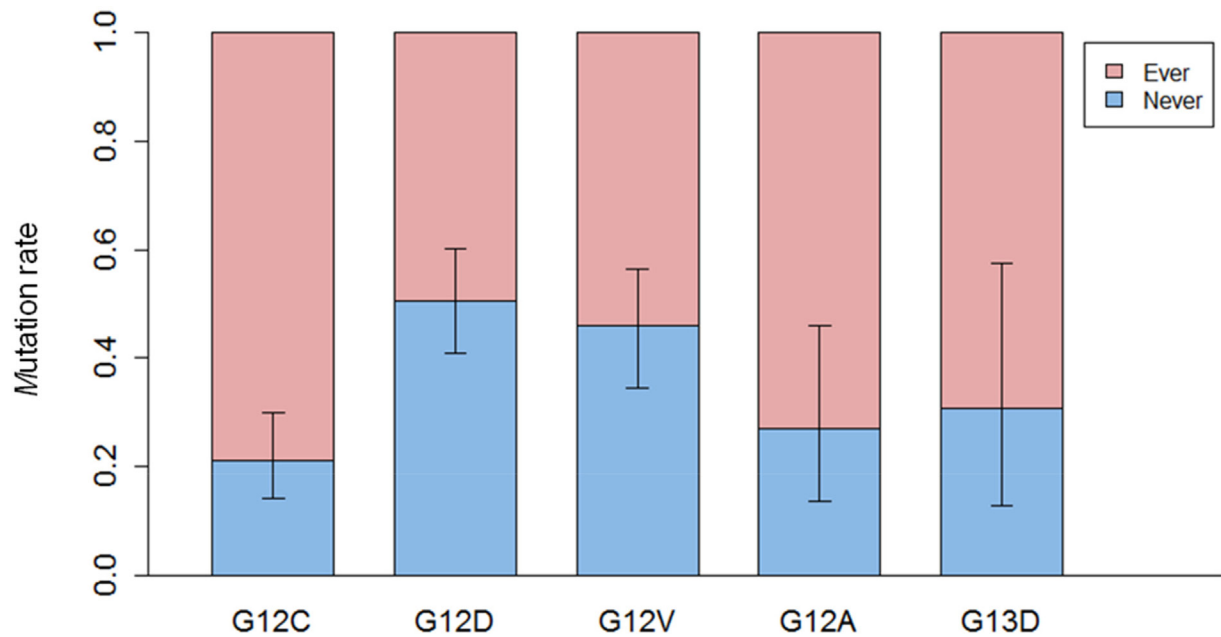

**Supplementary Figure S4j: Subtypes of *KRAS* mutation and smoking ratio.** G12C mutations are more frequent in smokers than G12D or G12V mutations.

Supplementary Figure S5: Association between clinicopathologic features and *ALK* rearrangement.

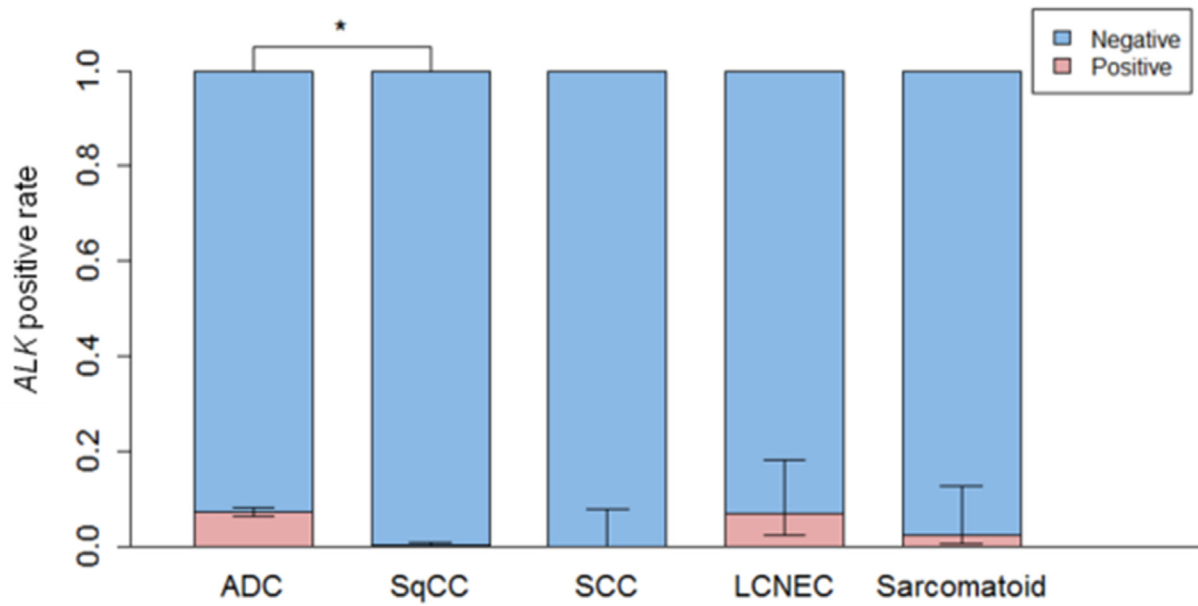

Supplementary Figure S5a: Histologic types of lung cancer and *ALK* positive rate. *ALK* rearrangements are more frequent in adenocarcinoma

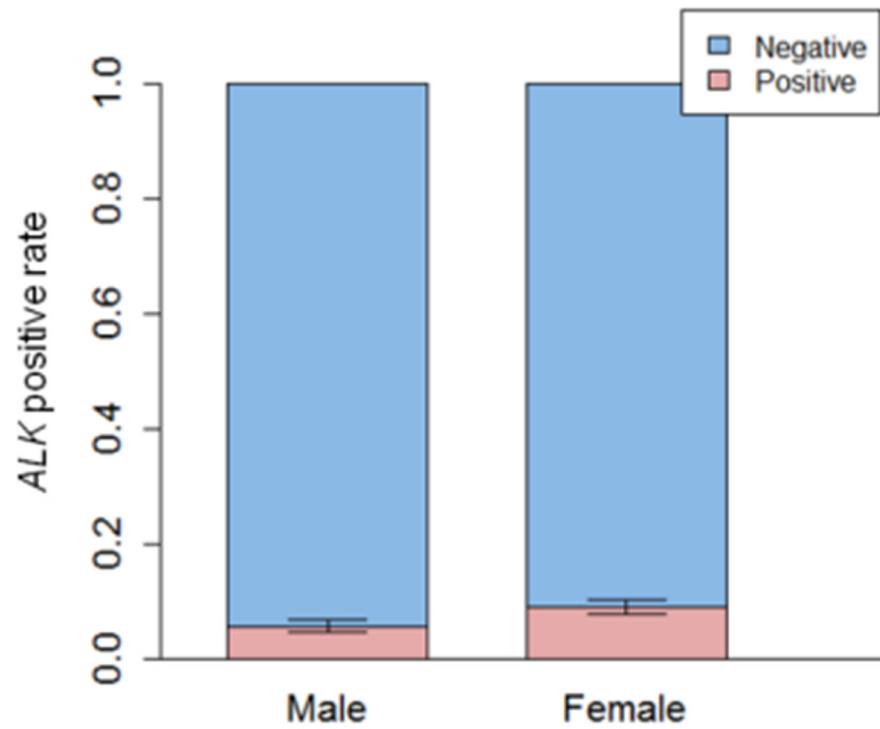

Supplementary Figure S5b: Sex and *ALK* positive rate. There is no significant difference of *ALK* rearrangement between male and female patients

(Continued)

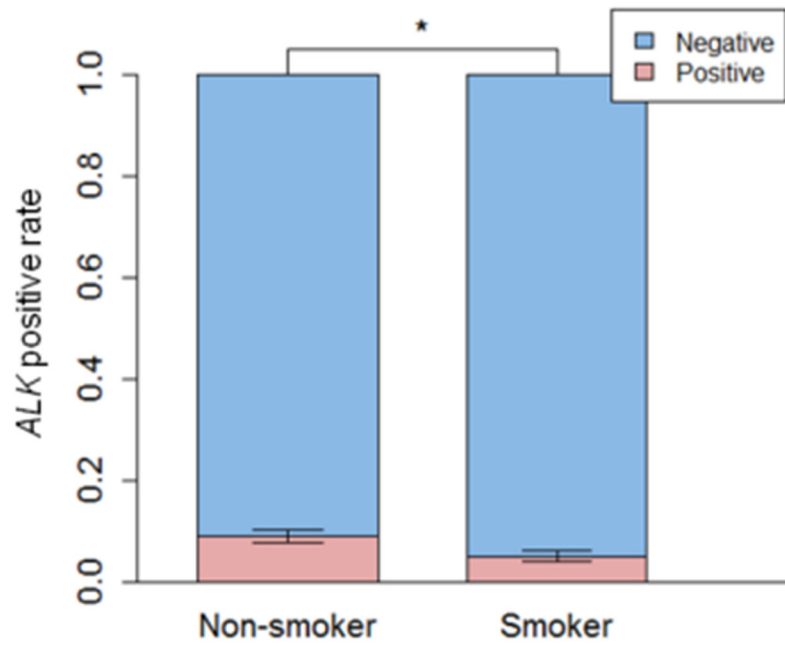

Supplementary Figure S5c: Smoking history and *ALK* positive rate. *ALK* rearrangements were more frequent in non-smoker.

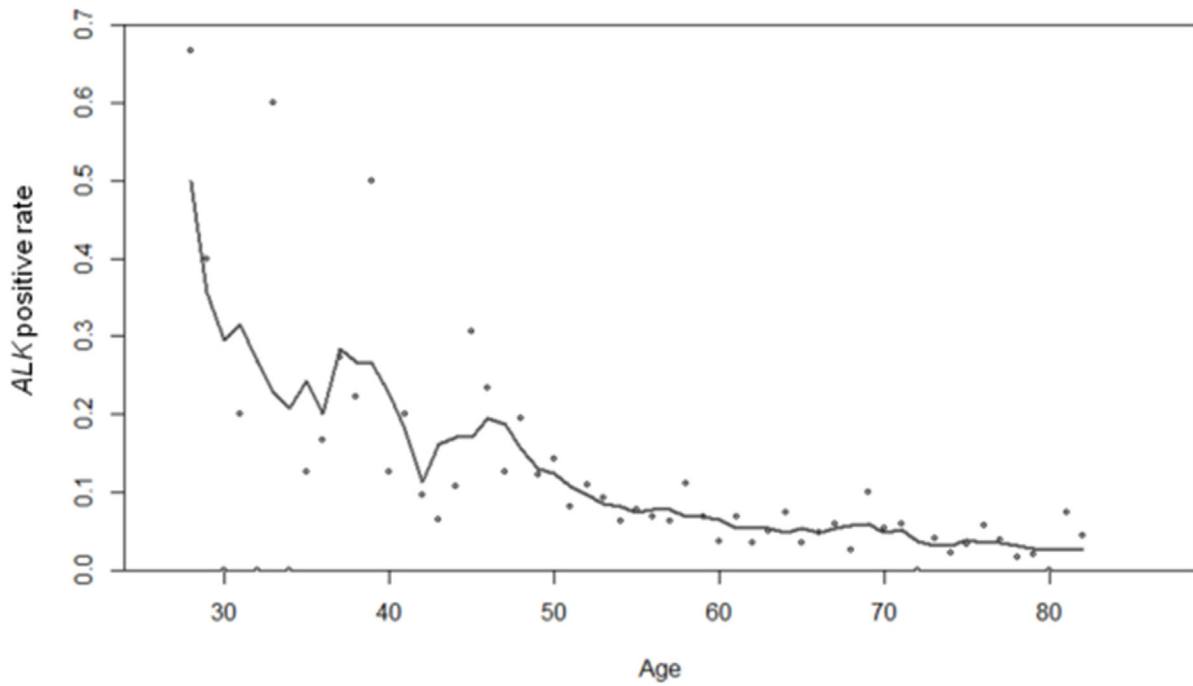

Supplementary Figure S5d: Age and *ALK* positive rate. Dots represent *ALK* rearrangement proportion at specific age. The line represents the moving average trend of *ALK* rearrangement proportion. *ALK* rearrangements are more frequent in young patients.

(Continued)

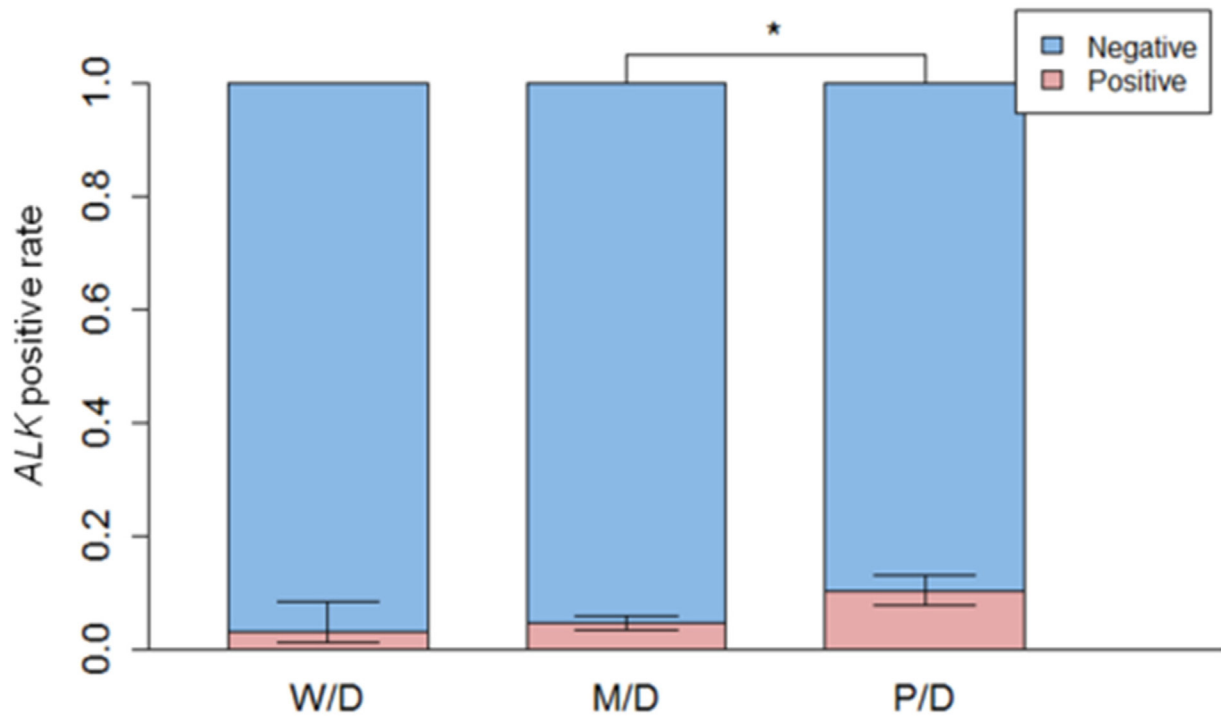

**Supplementary Figure S5e: Tumor differentiation and *ALK* positive rate.** *ALK* rearrangements are more frequent in poorly differentiated tumor.

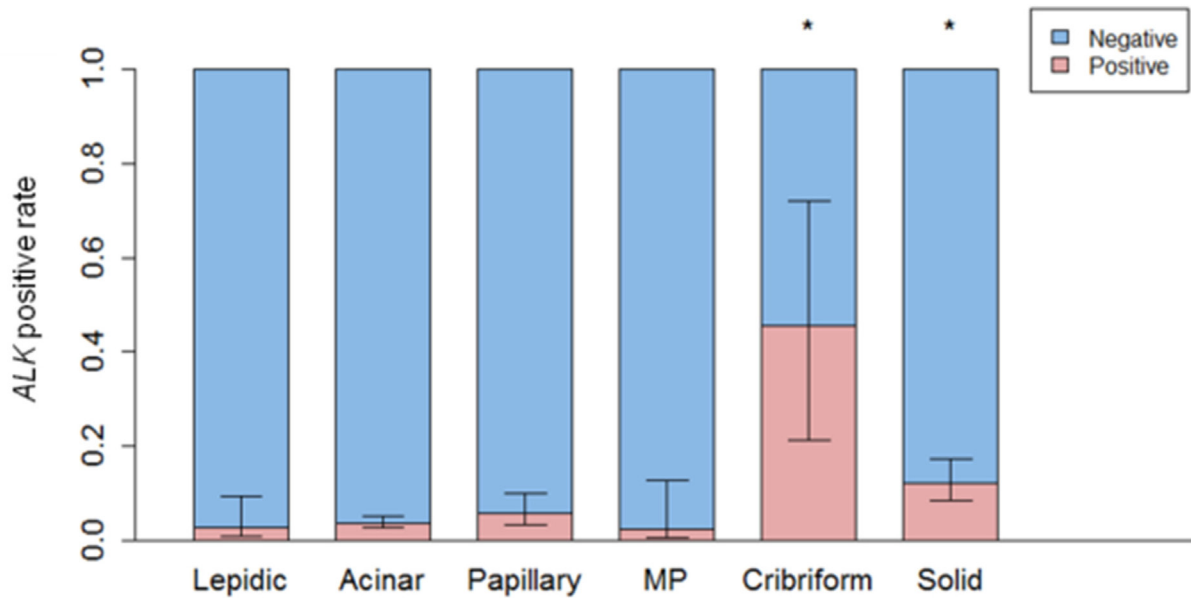

**Supplementary Figure S5f: Primary pattern and *ALK* positive rate.** *ALK* rearrangements are more frequent in cribriform and solid patterns.

(Continued)

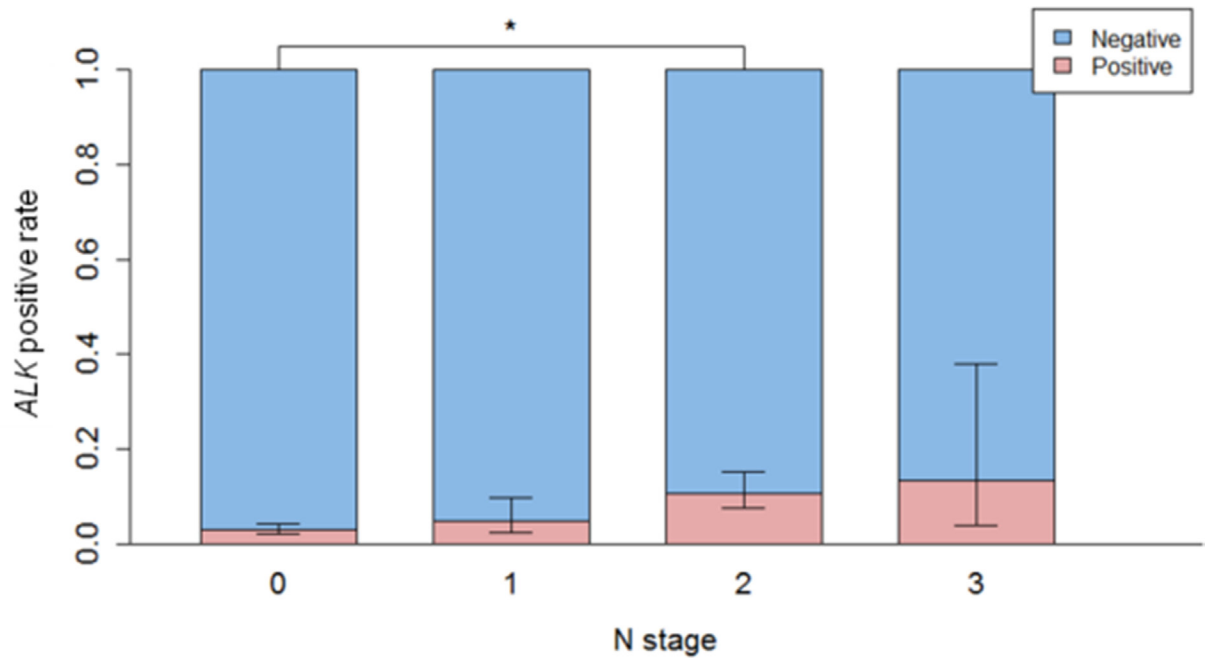

Supplementary Figure S5g: N stage and *ALK* positive rate. *ALK* rearrangements are more frequent in higher N stages.



Supplementary Figure S6: Chromatogram and histologic slide, and FISH results of tumors having both *EGFR* and *KRAS* or *EGFR* and *KRAS* mutations.

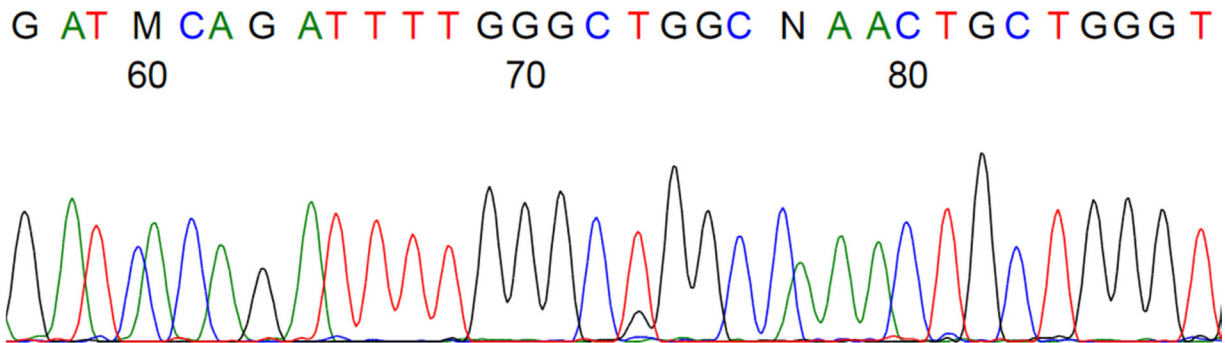

Supplementary Figure S6a: Chromatogram of *EGFR* exon 21 of DM01. L858R point mutation is detected.

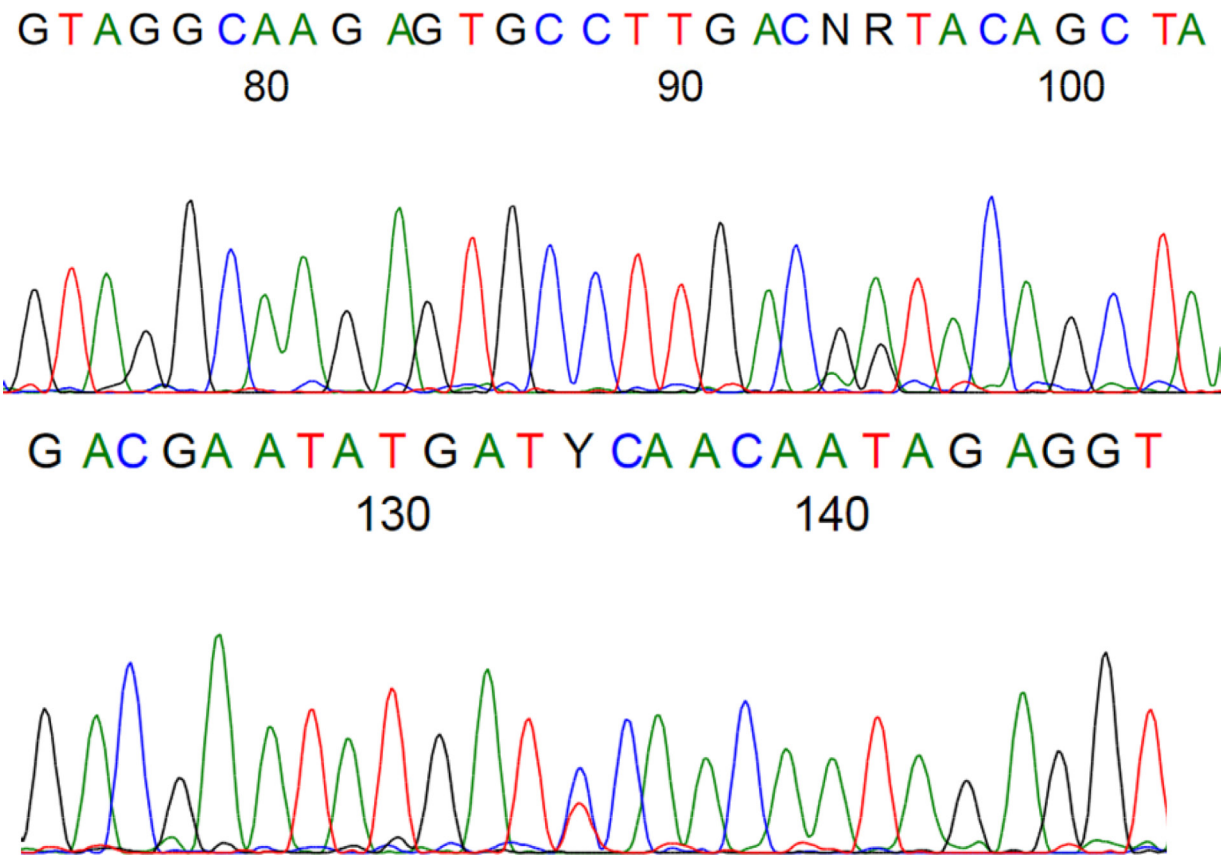

Supplementary Figure S6b: Chromatogram of *KRAS* exon 2 of DM01. I21S and P34S point mutations are detected.

(Continued)

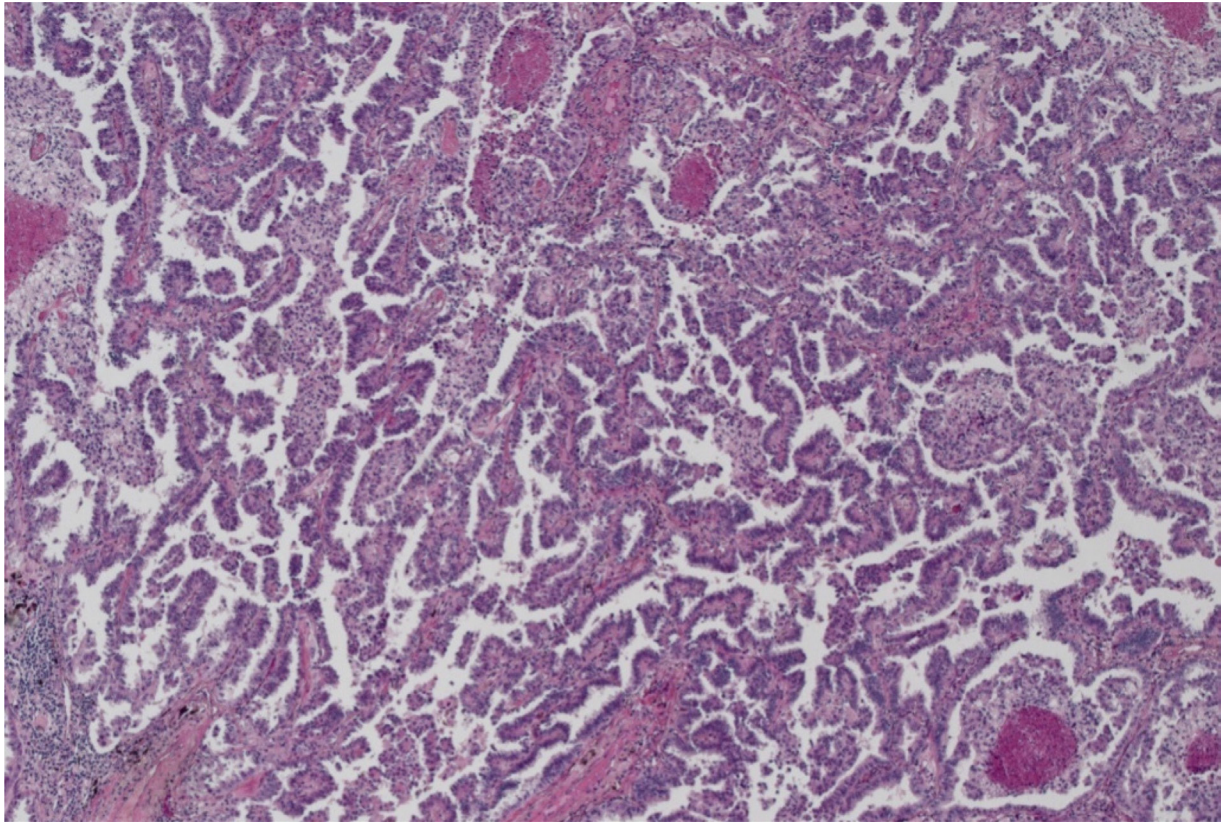

Supplementary Figure S6c: H&E slide of DM01. The tumor has primarily papillary pattern.

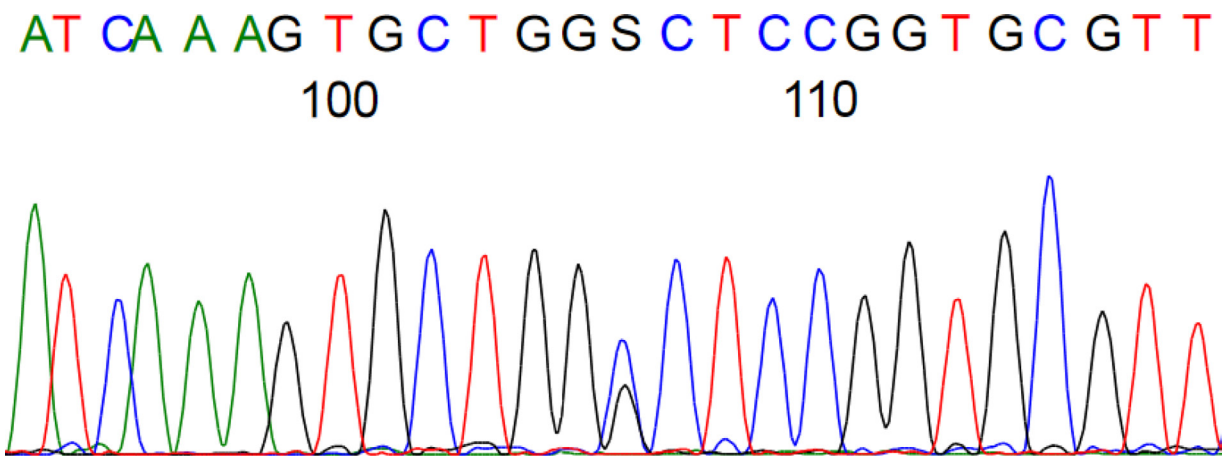

Supplementary Figure S6d: *EGFR* exon 18 chromatogram of DM02. A G719A point mutation is detected.

(Continued)

GT TGG A G C TG GTG GC GTAG  
90

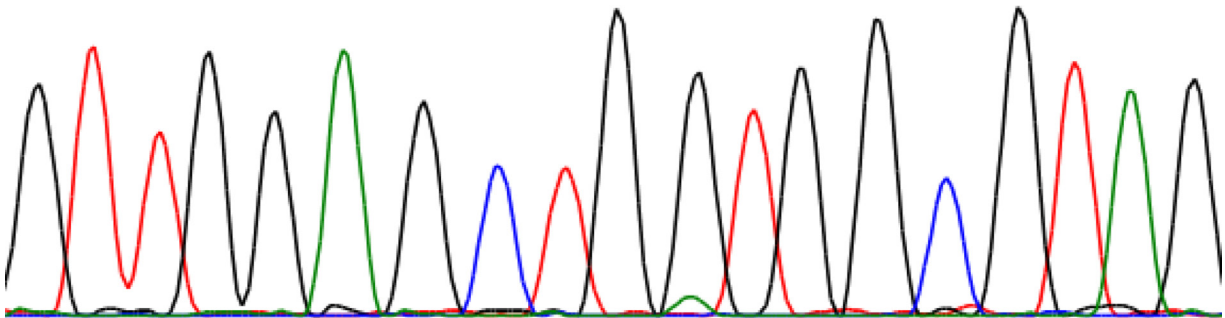

Supplementary Figure S6e: *KRAS* exon 2 chromatogram of DM02. A G12D point mutation is detected.

CCC GT C GC TAT C ANN A T NNMS NRAAG CNA MMWN NG A  
50 60 70

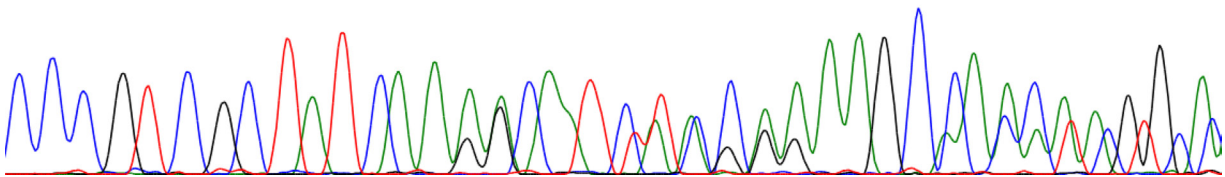

Supplementary Figure S6f: Chromatogram of *EGFR* exon 19 of DM03. 15 base pair deletion is detected.

(Continued)

GT TGG A G C T G N T G G C G T A G G C A  
40 50

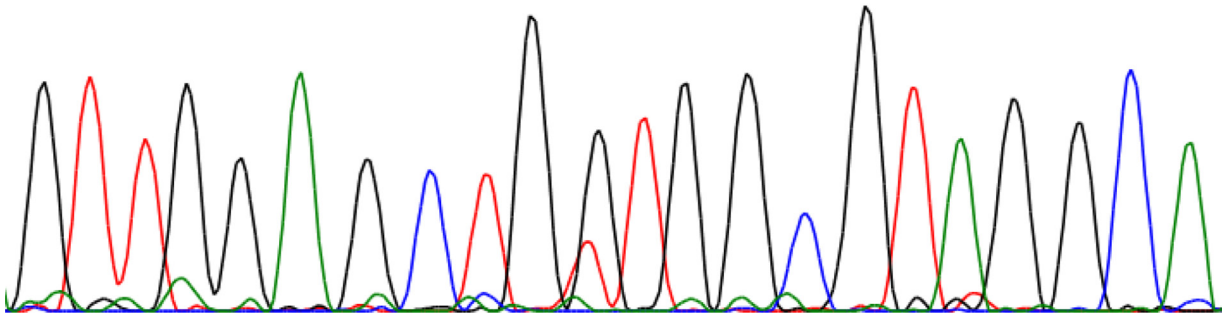

Supplementary Figure S6g: Chromatogram of *KRAS* exon 2 of DM03. G12V point mutation is identified.

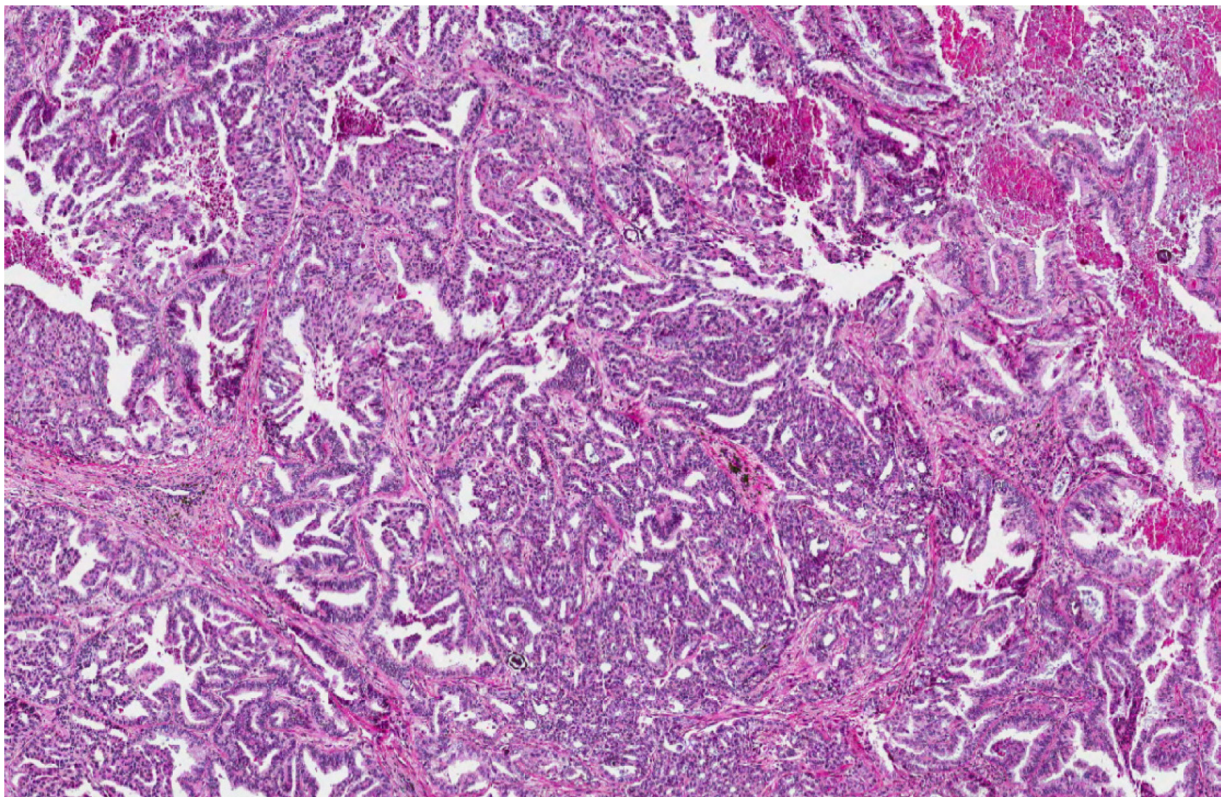

Supplementary Figure S6h: H&E slide of DM03. The tumor has primarily papillary pattern.

(Continued)

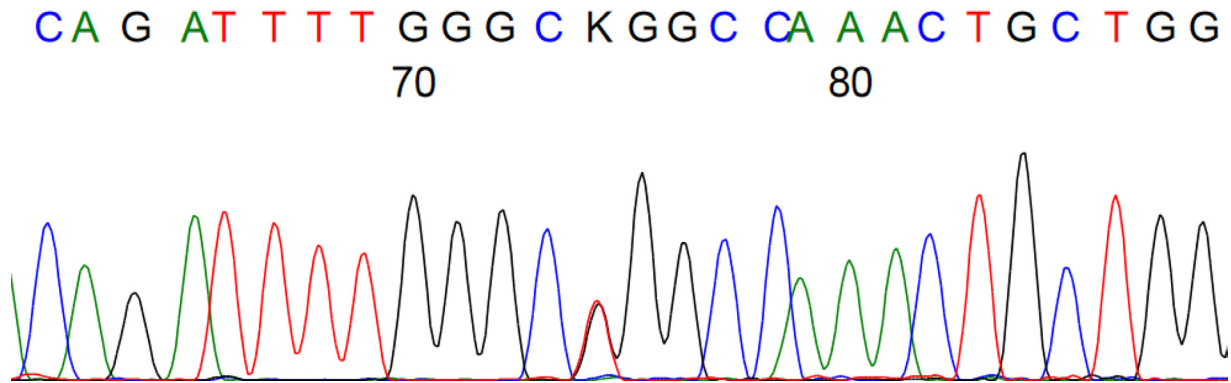

Supplementary Figure S6i: Chromatogram of *EGFR* exon 21 of DM04. L858R point mutation is detected.

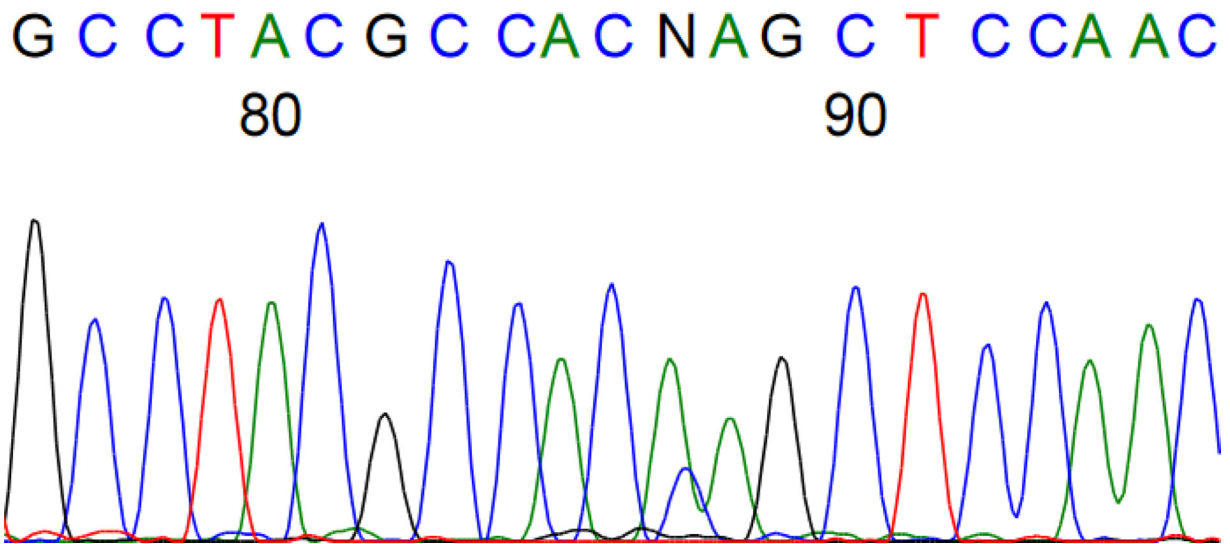

Supplementary Figure S6j: Chromatogram of *KRAS* exon 2 of DM04. G12D point mutation is detected.

(Continued)

T T T G G G C N G G C C A A A C T G C  
80

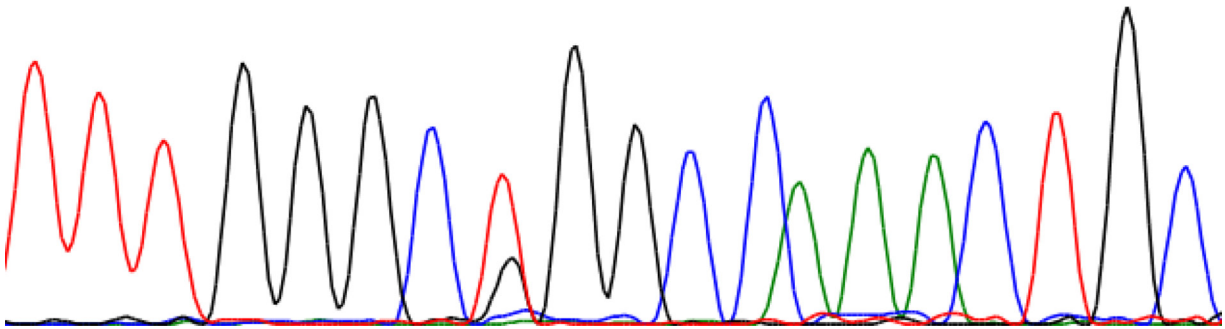

Supplementary Figure S6k: Chromatogram of *EGFR* exon 21 of DM05. L858R point mutation is detected.

G G A G C T G G T G S C G T A G G C A A  
70 80

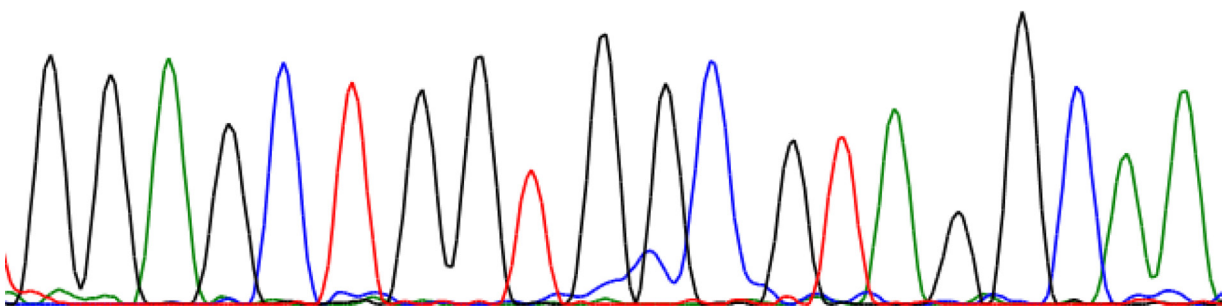

Supplementary Figure S6l: Chromatogram of *KRAS* exon 2 of DM05. G13A point mutation is detected.

(Continued)

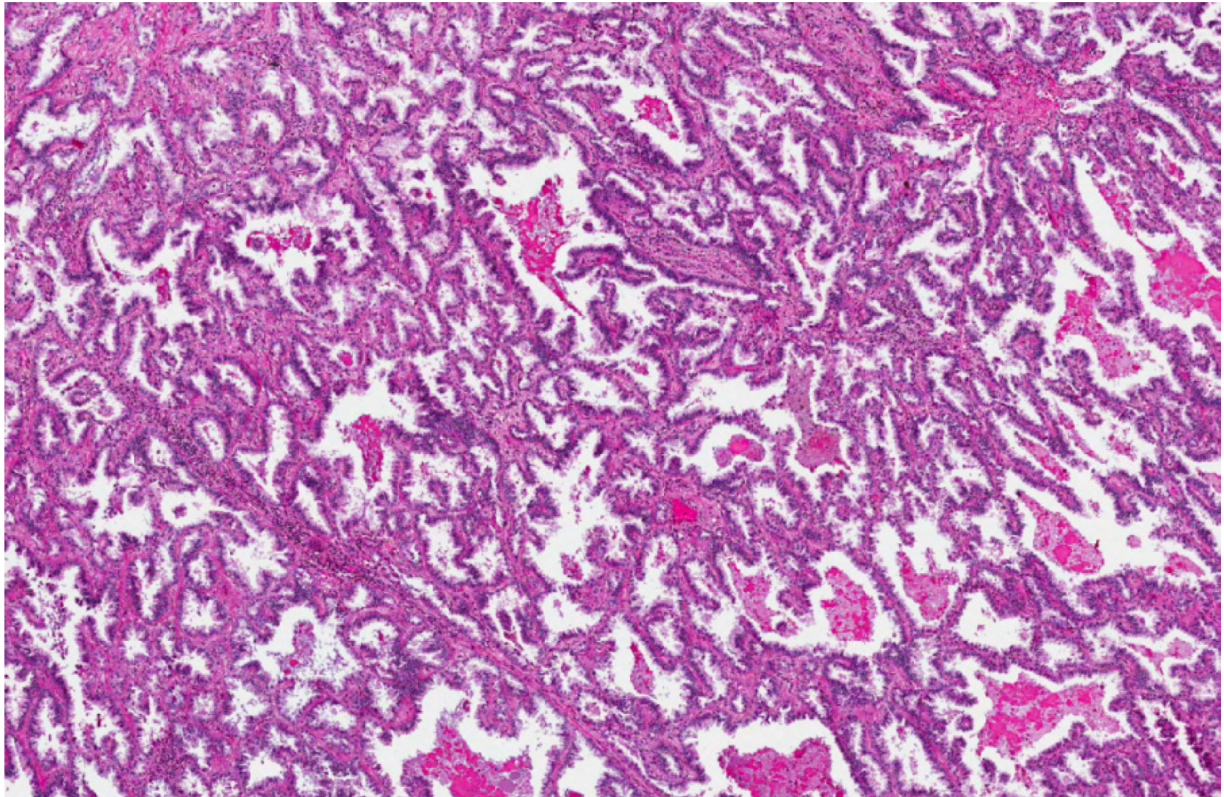

Supplementary Figure S6m: H&E slide of DM05. The tumor has primarily papillary pattern.

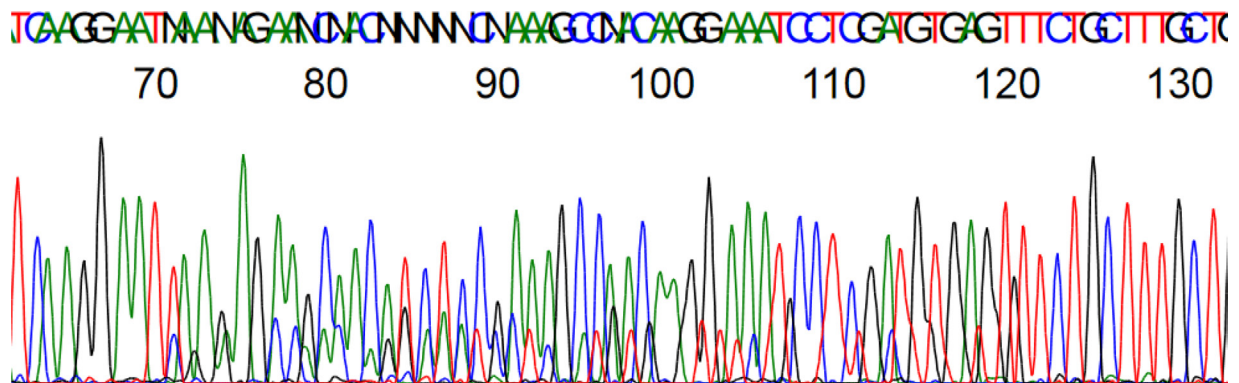

Supplementary Figure S6n: *EGFR* exon 19 chromatogram of DM06. 18 base-pairs are deleted.

(Continued)

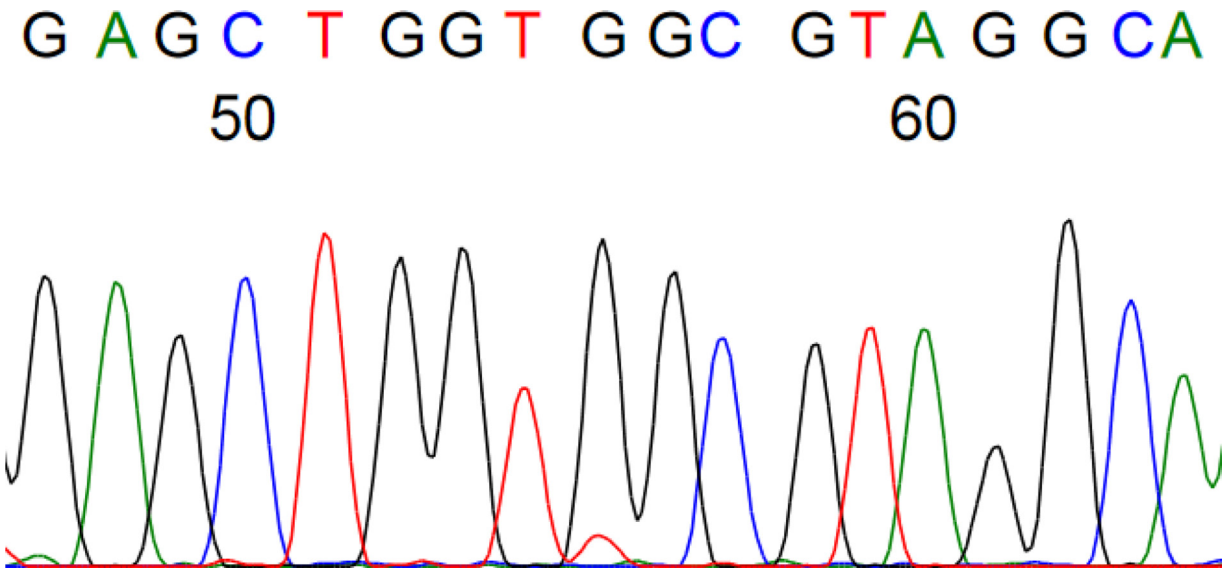

Supplementary Figure S6o: *KRAS* exon 2 chromatogram of DM06. A G13C point mutation is detected.

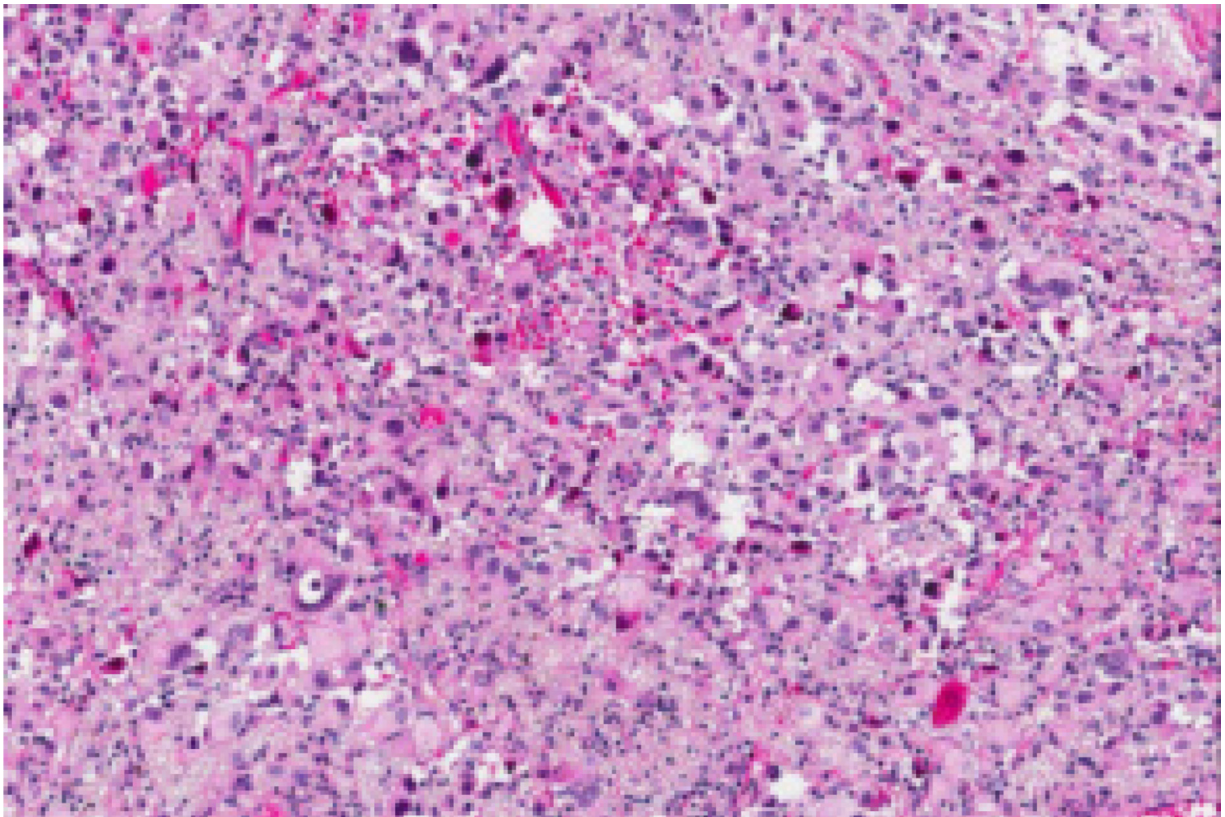

Supplementary Figure S6p: H&E slide of DM06. The tumor has primarily solid pattern.

(Continued)



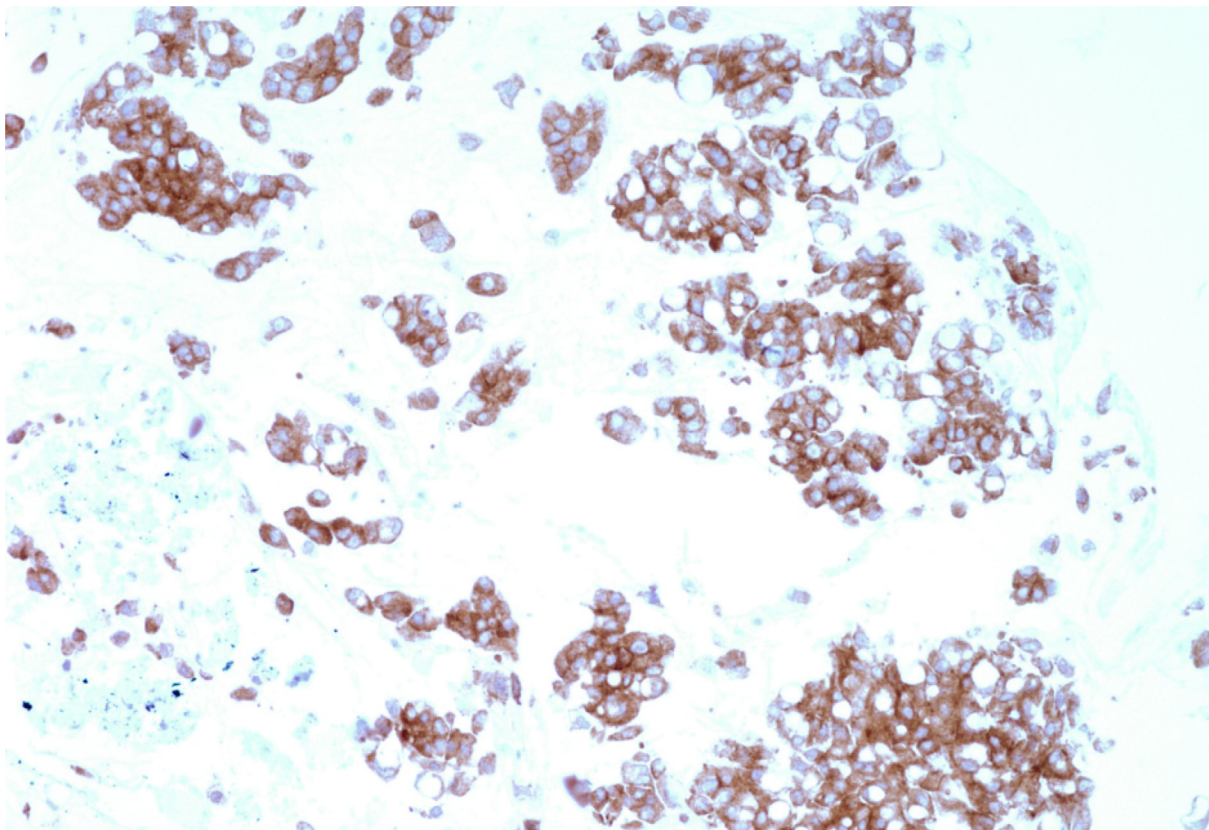

Supplementary Figure S6q: Immunohistochemistry of ALK of DM07. Diffuse cytoplasmic stain is observed.

GG AC TA T GT C C GGG AACACA A  
230 240

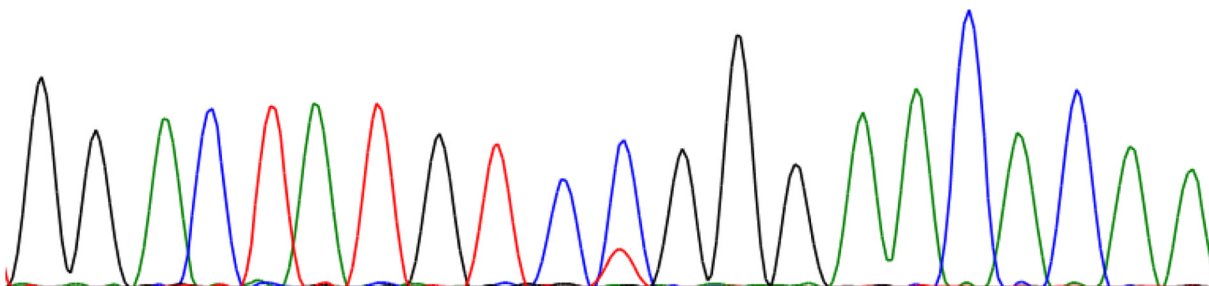

Supplementary Figure S6r: *EGFR* exon 20 chromatogram of DM08. A R803W point mutation is identified.

(Continued)

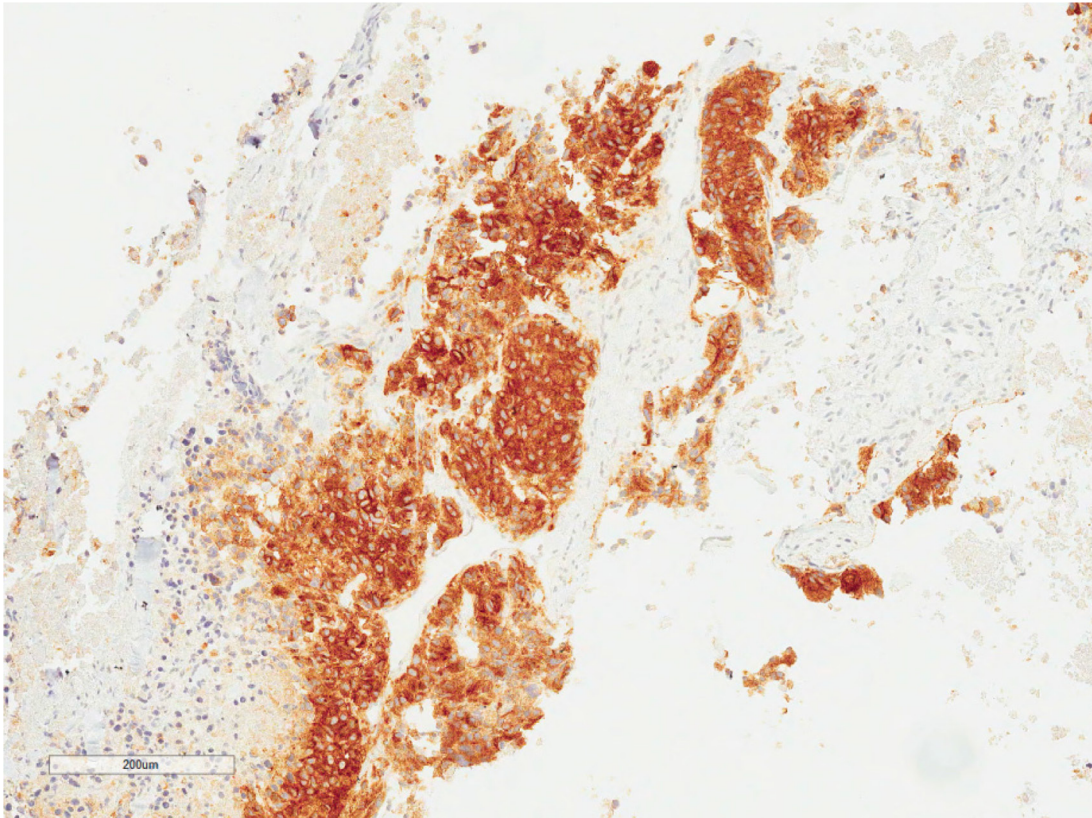

**Supplementary Figure S6s:** *ALK* immunohistochemistry staining of DM08. Diffuse cytoplasmic staining is observed.

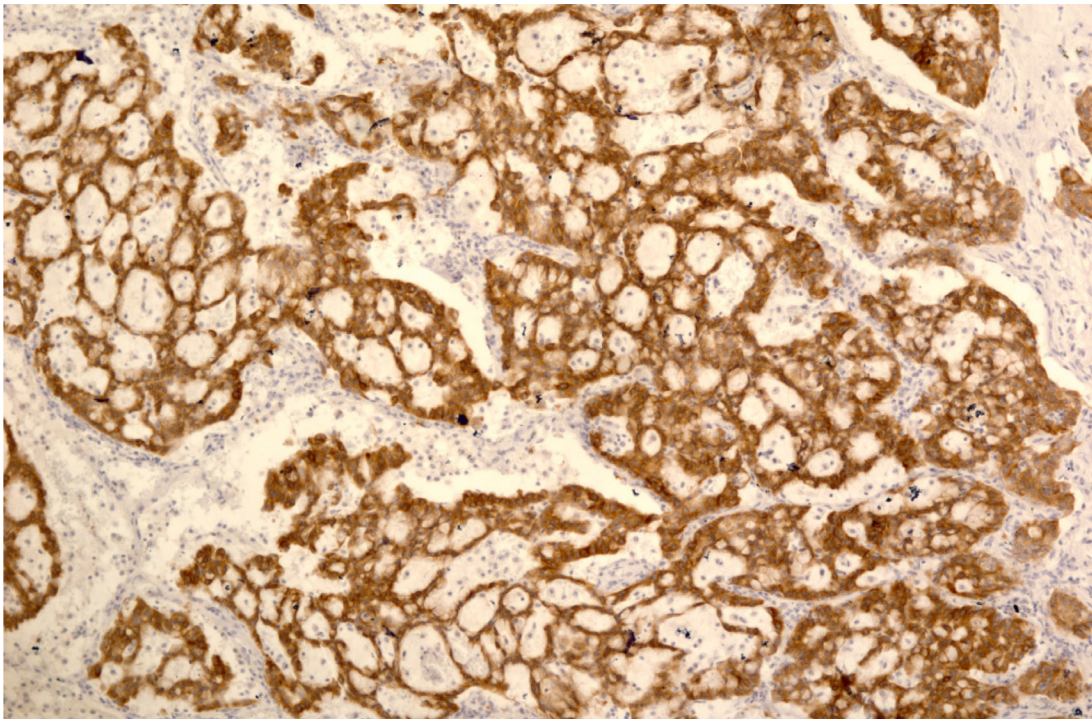

**Supplementary Figure S6t:** Immunohistochemistry of ALK of DM09. Diffuse cytoplasmic stain is observed.

(Continued)

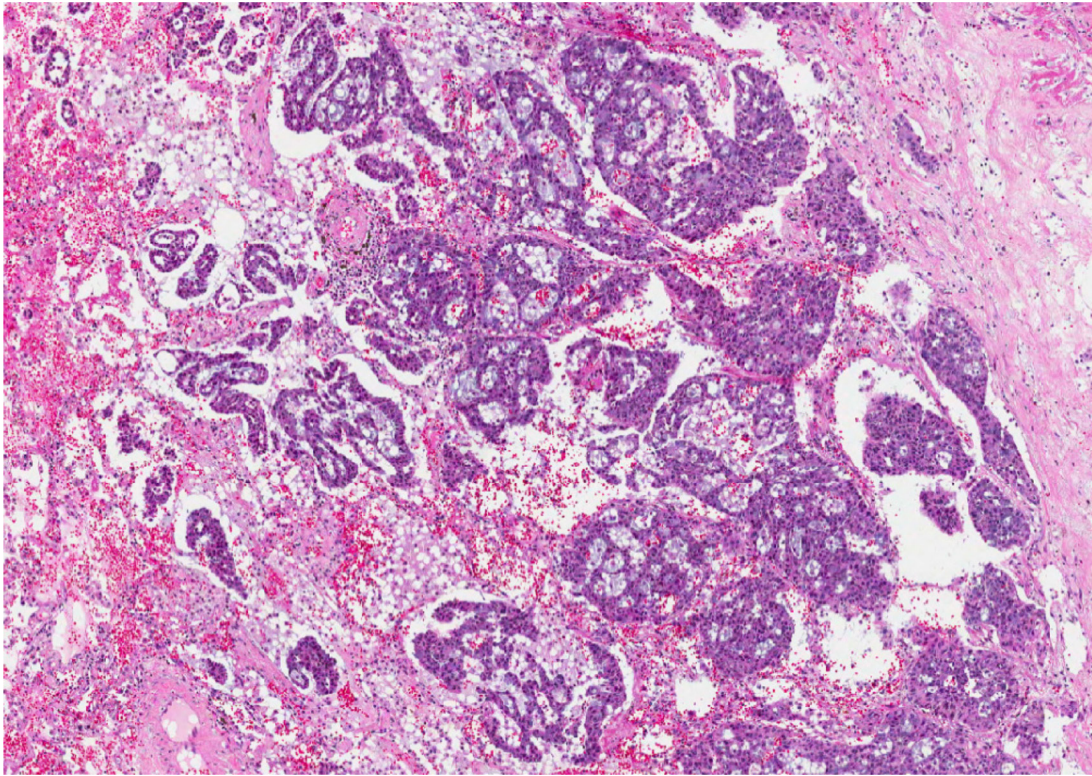

**Supplementary Figure S6u: H&E slide of DM09.** The tumor has cribriform pattern.

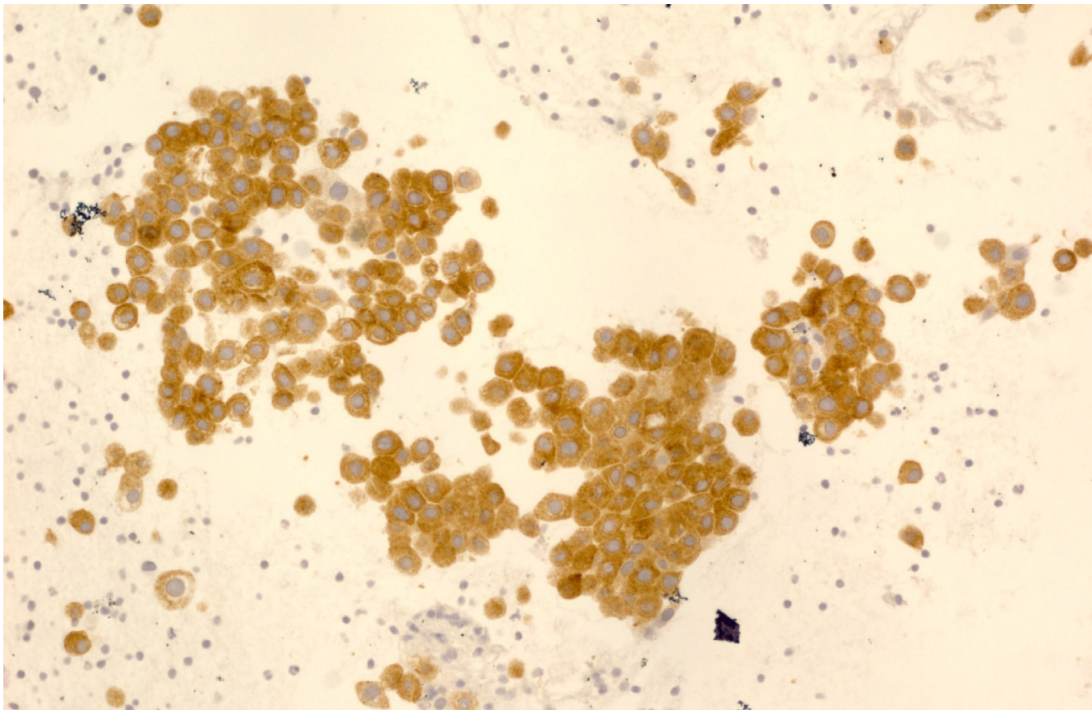

**Supplementary Figure S6v: Immunohistochemistry of ALK of DM10.** Diffuse cytoplasmic stain is observed.

*(Continued)*

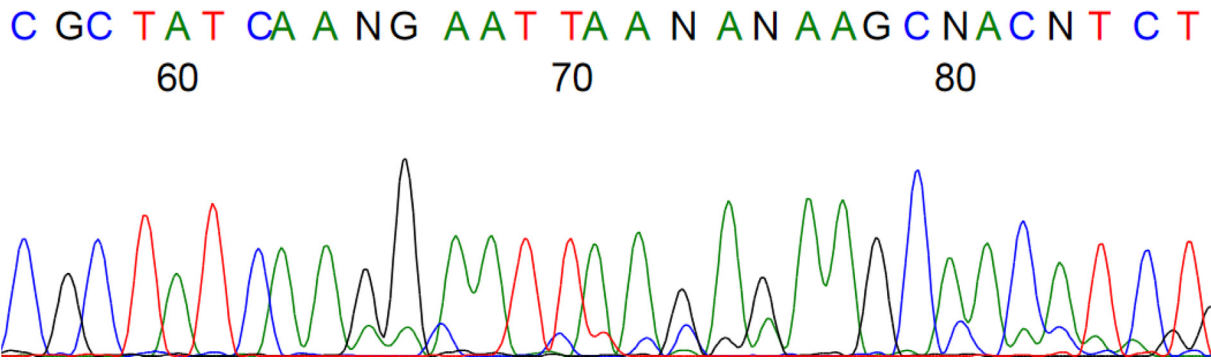

Supplementary Figure S6w: Chromatogram of *EGFR* exon 19 of DM11. 15 base pair deletion is detected.

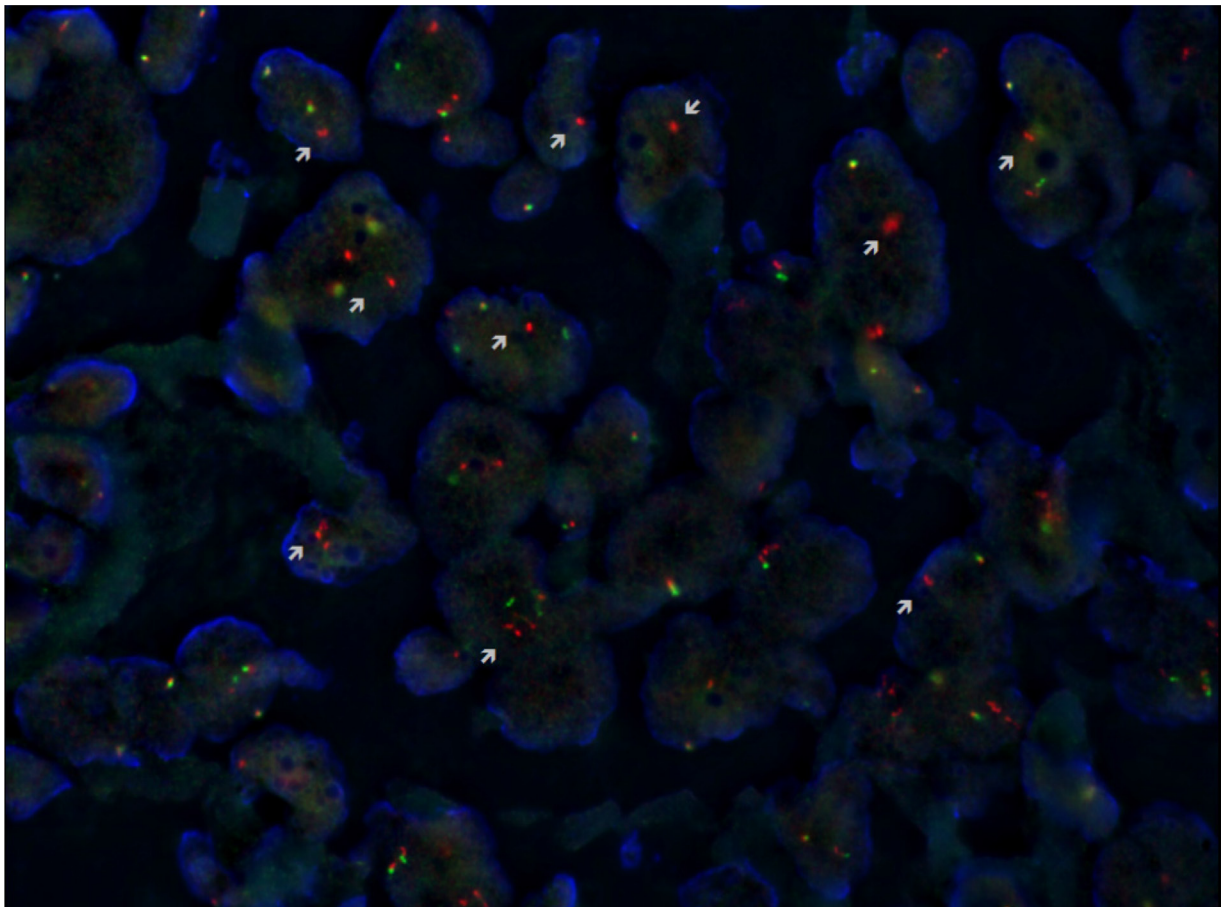

Supplementary Figure S6x: *ALK* FISH of DM11. Separate probe signals are detected.

(Continued)

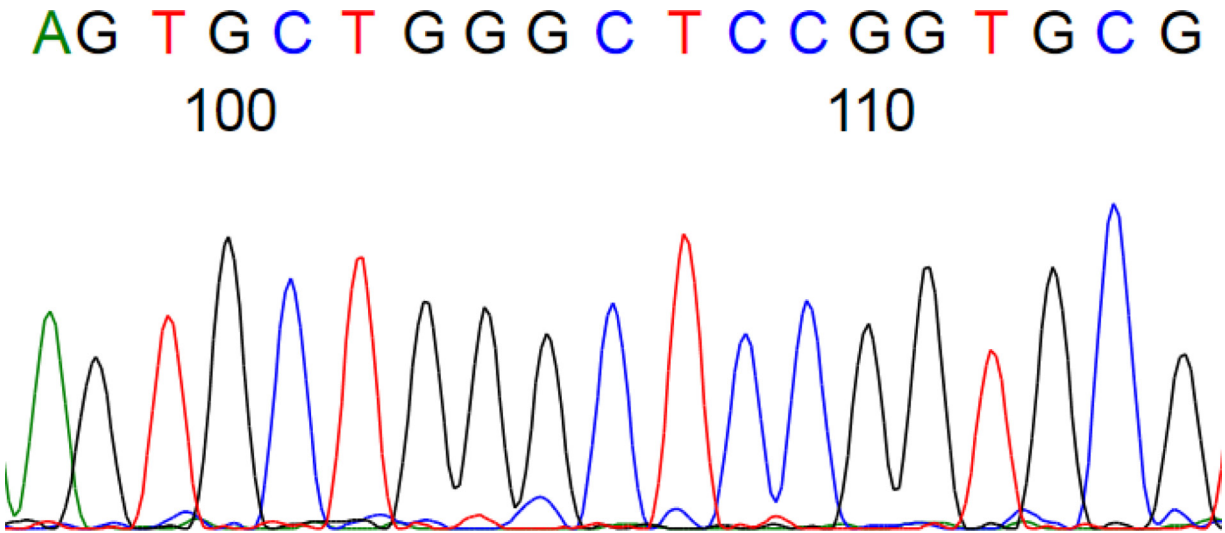

Supplementary Figure S6y: Chromatogram of *EGFR* exon 18 of DM12. G719A point mutation is detected.

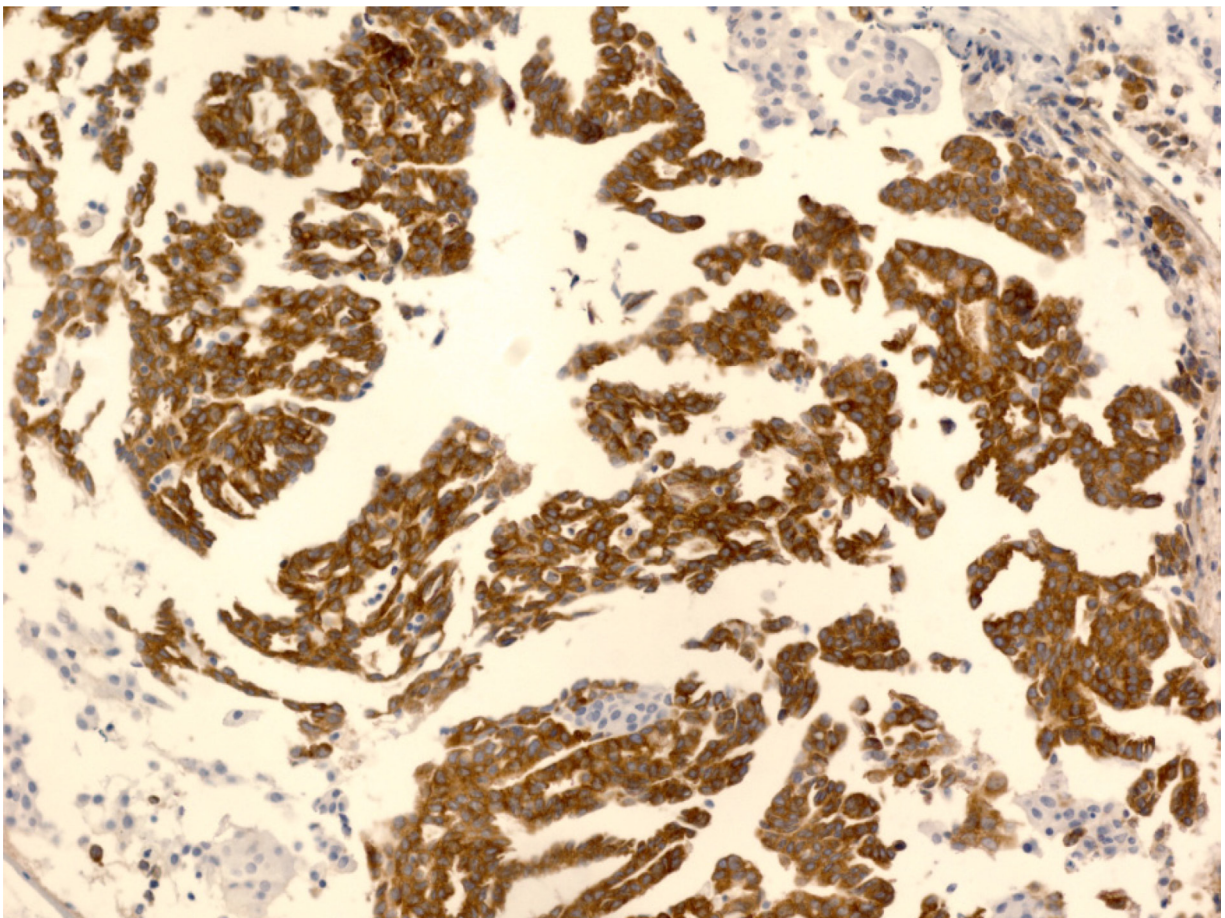

Supplementary Figure S6z: Immunohistochemistry of ALK of DM12. Diffuse cytoplasmic stain is observed.

(Continued)

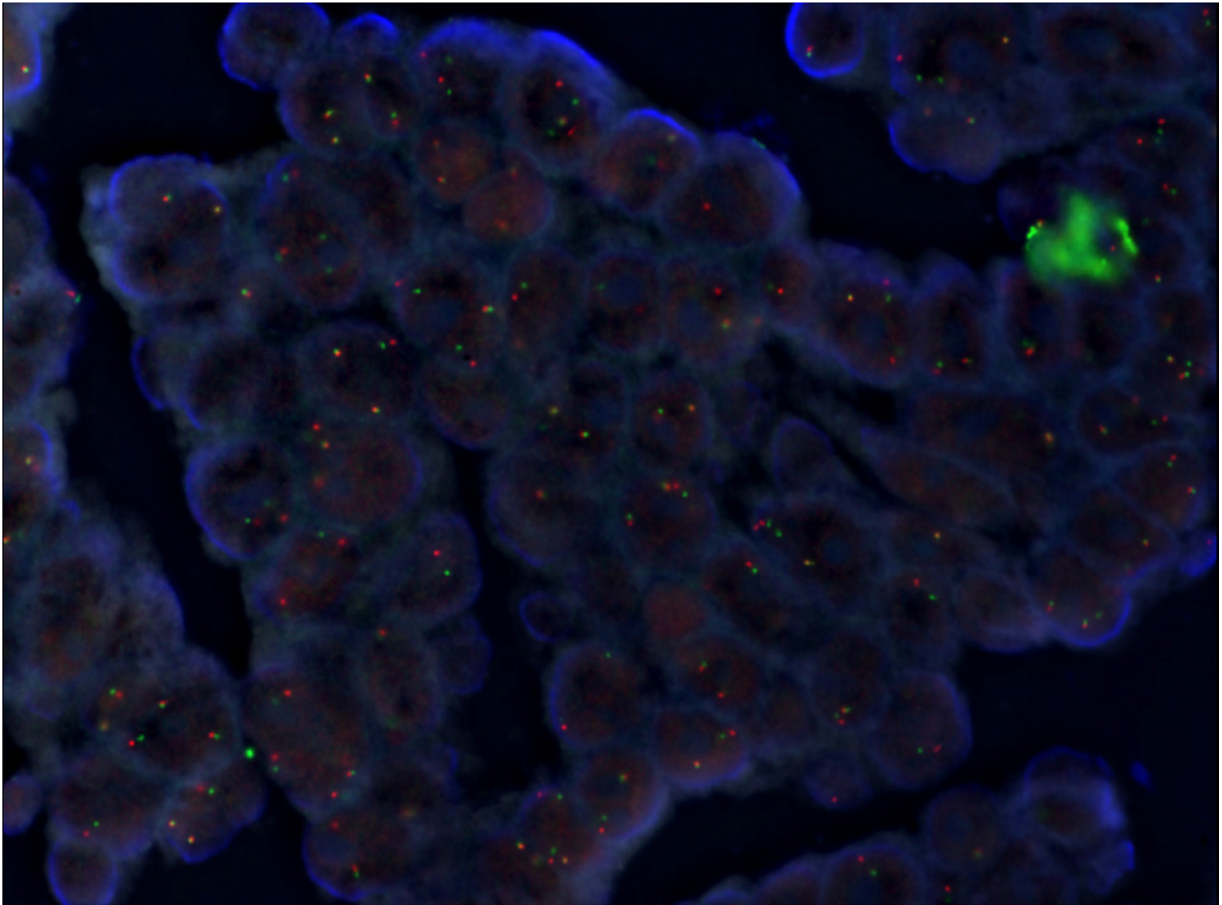

Supplementary Figure S6aa: *ALK* FISH of DM12. Separate probe signals are detected.

**Supplementary Table S1: Summary of test samples**

|                      |                                         |              |
|----------------------|-----------------------------------------|--------------|
| Procedure            | Biopsy                                  | 4,322 (61.9) |
|                      | Resection                               | 2,548 (36.5) |
|                      | Cytology                                | 115 (1.6)    |
| Bx site              | Lung                                    | 4,407 (62.8) |
|                      | LN                                      | 988 (14.1)   |
|                      | Bronchus                                | 1,059 (15.1) |
|                      | Pleura                                  | 267 (3.8)    |
|                      | Bone                                    | 108 (1.5)    |
|                      | Body fluid                              | 66 (0.9)     |
|                      | Brain                                   | 67 (1)       |
|                      | Liver                                   | 56 (0.8)     |
| Test methods         | Both PNA-clamping and Sanger sequencing | 3,534 (49)   |
|                      | PNA-clamping                            | 810 (11.2)   |
|                      | Sanger sequencing                       | 2,861 (39.7) |
| Tumor proportion (%) | 0-19                                    | 298 (690)    |
|                      | 20-100                                  | 1985 (3262)  |

Supplementary Table S2: Association between test variables and *EGFR* mutation results

|                  |             | Univariate analysis |             |         | Multivariate analysis |             |         |
|------------------|-------------|---------------------|-------------|---------|-----------------------|-------------|---------|
|                  |             | OR                  | 95% CI      | P-value | OR                    | 95% CI      | P-value |
| Procedure        |             |                     |             |         |                       |             |         |
| vs. resection    | Biopsy      | 0.78                | 0.71 - 0.87 | <0.001  | 1.17                  | 1.03 - 1.34 | 0.020   |
|                  | Cytology    | 1.50                | 1.03 - 2.19 | 0.032   | 0.83                  | 0.18 - 3.06 | 0.786   |
| Bx site          |             |                     |             |         |                       |             |         |
| vs. lung         | LN          | 0.53                | 0.46 - 0.62 | <0.001  | 0.57                  | 0.46 - 0.69 | <0.001  |
|                  | Bronchus    | 0.37                | 0.31 - 0.43 | <0.001  | 0.67                  | 0.54 - 0.84 | <0.001  |
|                  | Pleura      | 1.14                | 0.89 - 1.47 | 0.292   | 0.80                  | 0.59 - 1.07 | 0.132   |
|                  | Bone        | 1.09                | 0.74 - 1.60 | 0.664   | 1.16                  | 0.72 - 1.87 | 0.550   |
|                  | Body fluid  | 1.77                | 1.09 - 2.92 | 0.022   | 1.25                  | 0.19 - 9.45 | 0.820   |
|                  | Brain       | 1.16                | 0.71 - 1.89 | 0.554   | 0.98                  | 0.54 - 1.79 | 0.951   |
|                  | Liver       | 1.04                | 0.61 - 1.77 | 0.877   | 0.60                  | 0.30 - 1.17 | 0.135   |
| Test methods     |             |                     |             |         |                       |             |         |
| vs. both.        | PNA only    | 1.08                | 0.93 - 1.27 | 0.315   | 1.10                  | 0.92 - 1.32 | 0.304   |
|                  | Sanger only | 0.86                | 0.77 - 0.95 | 0.003   | 0.82                  | 0.71 - 0.94 | 0.004   |
| Tumor proportion |             |                     |             |         |                       |             |         |
| vs. 20-100       | per 1%      | 1.00                | 1.00 - 1.00 | 0.136   | 1.01                  | 1.00 - 1.01 | <0.001  |
|                  | 0-19        | 0.71                | 0.61 - 0.82 | <0.001  | 0.71                  | 0.60 - 0.84 | <0.001  |

OR: odds ratio, CI: confidence interval, LN: lymph node, PNA: PNA-clamping method, Sanger: Sanger sequencing method



Supplementary Table S3: Summary of clinical variables

| Variables   |                       | Total Tumors<br>Number (percentage) | Adenocarcinoma<br>Number (percentage) |
|-------------|-----------------------|-------------------------------------|---------------------------------------|
| Sex         | Male                  | 3,917 (59)                          | 2,545 (50.7)                          |
|             | Female                | 2,720 (41)                          | 2,470 (49.3)                          |
| Age (years) | Mean $\pm$ SD         | 63.3 $\pm$ 11                       | 62.3 $\pm$ 10.9                       |
|             | 40-64                 | 3,086 (46.5)                        | 2,569 (51.2)                          |
|             | $\geq$ 65             | 3,411 (51.4)                        | 2,336 (46.6)                          |
|             | < 40                  | 140 (2.1)                           | 110 (2.2)                             |
| Smoking     | Never                 | 3,190 (49)                          | 2,859 (58.2)                          |
|             | Ever                  | 3,316 (51)                          | 2,051 (41.8)                          |
| Tumor type  | ADC                   | 5,015 (75.6)                        |                                       |
|             | SqCC                  | 1,155 (17.4)                        |                                       |
|             | SCC                   | 67 (1)                              |                                       |
|             | LCNEC                 | 64 (1)                              |                                       |
|             | Sarcomatoid carcinoma | 54 (0.8)                            |                                       |
|             | others                | 282 (4.2)                           |                                       |
| EGFR        | negative              | 4,208 (63.8)                        | 2,689 (54)                            |
|             | positive              | 2,387 (36.2)                        | 2,295 (46)                            |
| KRAS        | negative              | 4,779 (92.3)                        | 3,529 (90.8)                          |
|             | positive              | 397 (7.7)                           | 358 (9.2)                             |
| ALK         | negative              | 4,589 (94.2)                        | 3,497 (92.8)                          |
|             | positive              | 281 (5.8)                           | 270 (7.2)                             |

SD: standard deviation

ADC: adenocarcinoma, SqCC: squamous cell carcinoma,

SCC: small cell carcinoma, LCNEC: large cell neuroendocrine carcinoma

Supplementary Table S4: Summary of histopathologic variables

| Variables           |                | Total Tumors<br>Number (percentage) | Adenocarcinoma<br>Number (percentage) |
|---------------------|----------------|-------------------------------------|---------------------------------------|
| Tumor size (cm)     | Mean ± SD      | 3 ± 1.7                             | 2.8 ± 1.6                             |
| Differentiation     | well           | 205 (7.3)                           | 191 (8.9)                             |
|                     | moderate       | 1,673 (59.3)                        | 1,336 (62.5)                          |
|                     | poor           | 945 (33.5)                          | 612 (28.6)                            |
| Mucinous            |                | 184 (10.4)                          | 184 (10.4)                            |
| Signet ring cell    |                | 13 (0.8)                            | 13 (0.8)                              |
| Primary pattern     | lepidic        |                                     | 114 (6)                               |
|                     | acinar         |                                     | 1,240 (65.5)                          |
|                     | papillary      |                                     | 244 (12.9)                            |
|                     | micropapillary |                                     | 50 (2.6)                              |
|                     | cribriform     |                                     | 11 (0.6)                              |
|                     | solid          |                                     | 233 (12.3)                            |
| Vascular invasion   |                | 149 (7.2)                           | 89 (5.6)                              |
| Lymphatic invasion  |                | 640 (30.8)                          | 470 (29.7)                            |
| Perineural invasion |                | 113 (5.4)                           | 51 (3.2)                              |
| Pleural invasion    | P0             | 1,711 (80)                          | 1,331 (79.8)                          |
|                     | P1             | 186 (8.7)                           | 169 (10.1)                            |
|                     | P2             | 161 (7.5)                           | 121 (7.3)                             |
|                     | P3             | 80 (3.7)                            | 46 (2.8)                              |
|                     |                |                                     |                                       |
| Pathologic T stage  | T1             | 1,191 (51.5)                        | 1,013 (56.6)                          |
|                     | T2             | 921 (39.8)                          | 671 (37.5)                            |
|                     | T3             | 164 (7.1)                           | 84 (4.7)                              |
|                     | T4             | 37 (1.6)                            | 21 (1.2)                              |
|                     |                |                                     |                                       |
| Pathologic N stage  | N0             | 1,388 (67)                          | 1,109 (70.7)                          |
|                     | N1             | 289 (13.9)                          | 158 (10.1)                            |
|                     | N2             | 375 (18.1)                          | 286 (18.2)                            |
|                     | N3             | 21 (1)                              | 16 (1)                                |

SD: standard deviation

Supplementary Table S5: Association Between *EGFR* Mutation and Clinicopathologic Variables

|                               |                     | Univariate analysis |           |         | Multivariate analysis |           |         |
|-------------------------------|---------------------|---------------------|-----------|---------|-----------------------|-----------|---------|
|                               |                     | OR                  | 95% CI    | P-value | OR                    | 95% CI    | P-value |
| Sex                           | F vs. M             | 4.27                | 3.84-4.75 | <0.001  | 1.83                  | 1.56-2.16 | <0.001  |
| Age                           | per 1 year          | 0.98                | 0.98-0.98 | <0.001  | 0.99                  | 0.99-1.00 | 0.019   |
|                               | 40-64 vs. $\geq 65$ | 1.82                | 1.64-2.02 | <0.001  | 1.58                  | 1.41-1.76 | <0.001  |
|                               | 40-64 vs. < 40      | 1.83                | 1.27-2.67 | 0.002   | 2.19                  | 1.48-3.28 | <0.001  |
| Smoking Type                  | Never vs. ever      | 4.58                | 4.10-5.11 | <0.001  | 2.04                  | 1.73-2.41 | <0.001  |
|                               | ADC vs. non-ADC     | 22.3                | 16.9-30.3 | <0.001  | 14.0                  | 10.6-19.1 | <0.001  |
| KRAS                          | N vs. P             | 40.8                | 19.9-103  | <0.001  | 51.0                  | 24.8-129  | <0.001  |
| ALK                           | N vs. P             | 24.1                | 12.3-56.6 | <0.001  | 55.3                  | 28.0-130  | <0.001  |
| Differentiation               |                     |                     |           |         |                       |           |         |
| vs. poor                      | Well                | 3.85                | 2.67-5.58 | <0.001  | 2.46                  | 1.63-3.75 | <0.001  |
|                               | Moderate            | 3.24                | 2.70-3.89 | <0.001  | 2.74                  | 2.21-3.38 | <0.001  |
| Tumor size <sup>a</sup>       | per 1 cm            | 0.88                | 0.82-0.93 | <0.001  | 0.91                  | 0.85-0.97 | 0.003   |
| Mucinous <sup>a</sup>         | N vs. P             | 21.1                | 11.7-43.1 | <0.001  | 26.8                  | 14.7-54.9 | <0.001  |
| Signet ring cell <sup>a</sup> | N vs. P             | 15.0                | 2.95-274  | 0.009   | 17.2                  | 3.25-317  | 0.007   |
| Pattern <sup>a</sup>          |                     |                     |           |         |                       |           |         |
| vs. solid                     | Lepidic             | 2.03                | 1.27-3.24 | 0.003   | 2.18                  | 1.30-3.69 | 0.003   |
|                               | Acinar              | 3.88                | 2.87-5.30 | <0.001  | 3.38                  | 2.46-4.67 | <0.001  |
|                               | Papillary           | 3.46                | 2.37-5.09 | <0.001  | 3.17                  | 2.13-4.75 | <0.001  |
|                               | Micropapillary      | 0.96                | 0.47-1.86 | 0.901   | 1.05                  | 0.48-2.19 | 0.898   |
|                               | Cribriform          | 0.25                | 0.01-1.32 | 0.186   | 0.17                  | 0.01-0.96 | 0.100   |

a: Analysis is performed with adenocarcinoma

OR: odds ratio, CI: confidence interval of odds ratio, M: male, F: female, ADC: adenocarcinoma, N: negative, P: positive

**Supplementary Table S6: Frequency, proportion and positive rate of different type of *EGFR* mutations**

|                      | Frequency | Proportion (%) | Positive rate (%) |
|----------------------|-----------|----------------|-------------------|
| Exon 19 deletion     | 1,262     | 48.6           | 19.1              |
| L858R                | 921       | 35.4           | 13.3              |
| T790M                | 161       | 6.2            | 2.4               |
| G719X                | 81        | 3.1            | 1.2               |
| Exon 20 insertion    | 54        | 2.1            | 0.8               |
| S768I                | 20        | 0.8            | 0.3               |
| Exon 19 insertion    | 11        | 0.4            | 0.2               |
| L861Q                | 10        | 0.4            | 0.2               |
| E709K                | 9         | 0.3            | 0.1               |
| L747P                | 6         | 0.2            | 0.1               |
| L833V                | 6         | 0.2            | 0.09              |
| L861R                | 4         | 0.2            | 0.06              |
| S720P                | 3         | 0.1            | 0.04              |
| R776H                | 3         | 0.1            | 0.04              |
| A722T                | 3         | 0.1            | 0.04              |
| E709A                | 3         | 0.1            | 0.04              |
| V774M                | 3         | 0.1            | 0.04              |
| H835L                | 3         | 0.1            | 0.04              |
| Other rare mutations | 36        | 1.4            | 0.5               |

Proportion is frequency divided by total number of positive mutations ( $N=2,599$ ). Positive rate is frequency divided by total number of tumors with or without *EGFR* mutations ( $N=6,595$ )

Supplementary Table S7: Association between *KRAS* mutation and clinicopathologic variables

|                         |                   | Univariate analysis |           |         | Multivariate analysis |           |         |
|-------------------------|-------------------|---------------------|-----------|---------|-----------------------|-----------|---------|
|                         |                   | OR                  | 95% CI    | P-value | OR                    | 95% CI    | P-value |
| Sex                     | M vs. F           | 2.04                | 1.62-2.58 | <0.001  | 1.67                  | 1.18-2.35 | 0.003   |
| Age                     | per 1 year        | 1.03                | 1.02-1.04 | <0.001  | 1.03                  | 1.02-1.04 | <0.001  |
| 40-64 vs.               | ≥ 65              | 1.57                | 1.27-1.95 | <0.001  | 1.72                  | 1.38-2.14 | <0.001  |
|                         | < 40              | 0.58                | 0.18-1.41 | 0.294   | 0.66                  | 0.02-1.62 | 0.426   |
| Smoking                 | Ever vs. Never    | 1.92                | 1.55-2.39 | <0.001  | 1.78                  | 1.30-2.47 | <0.001  |
| Type                    | ADC vs. non-ADC   | 4.27                | 2.89-6.61 | <0.001  | 7.28                  | 4.85-11.5 | <0.001  |
| EGFR                    | P vs. N           | 0.02                | 0.01-0.05 | <0.001  | 0.02                  | 0.01-0.04 | <0.001  |
| Tumor size <sup>a</sup> | per 1 cm          | 1.21                | 1.11-1.33 | <0.001  | 1.17                  | 1.07-1.28 | <0.001  |
| Differentiation         |                   |                     |           |         |                       |           |         |
|                         | Poor vs. well     | 2.39                | 1.04-6.92 | 0.065   | 1.94                  | 0.84-5.66 | 0.164   |
|                         | Poor vs. moderate | 2.12                | 1.50-3.01 | <0.001  | 1.88                  | 1.30-2.73 | 0.001   |
| Mucinous <sup>a</sup>   | P vs. N           | 7.96                | 5.32-11.9 | <0.001  | 9.09                  | 5.96-13.9 | <0.001  |
| Pattern <sup>a</sup>    |                   |                     |           |         |                       |           |         |
| vs. acinar              | Lepidic           | 1.86                | 0.79-3.86 | 0.118   | 2.28                  | 0.96-4.85 | 0.044   |
|                         | Papillary         | 1.76                | 1.00-3.00 | 0.043   | 1.66                  | 0.92-2.86 | 0.078   |
|                         | Micropapillary    | 2.34                | 1.04-4.73 | 0.026   | 2.43                  | 1.06-5.03 | 0.024   |
|                         | Cribriform        | 3.64                | 0.19-23.1 | 0.243   | 4.04                  | 0.20-29.0 | 0.226   |
|                         | Solid             | 2.86                | 1.70-4.70 | <0.001  | 2.57                  | 1.50-4.30 | <0.001  |

a: Analysis is performed with adenocarcinoma

OR: odds ratio, CI: confidence interval of odds ratio, M: male, F: female, ADC: adenocarcinoma, N: negative, P: positive

Supplementary Table S8: Association between *ALK* rearrangement and clinicopathologic variables

|                      |                   | Univariate analysis |           |         | Multivariate analysis |            |         |
|----------------------|-------------------|---------------------|-----------|---------|-----------------------|------------|---------|
|                      |                   | OR                  | 95% CI    | P-value | OR                    | 95% CI     | P-value |
| Sex                  | F vs. M           | 2.25                | 1.77-2.89 | <0.001  | 1.06                  | 0.74-1.53  | 0.753   |
| Age                  | per 1 year        | 0.94                | 0.93-0.95 | <0.001  | 0.95                  | 0.94-0.96  | <0.001  |
| vs. 40-64            | >= 65             | 0.37                | 0.28-0.49 | <0.001  | 0.45                  | 0.34-0.59  | <0.001  |
|                      | < 40              | 2.69                | 1.55-4.44 | <0.001  | 2.81                  | 1.60-4.72  | <0.001  |
| Smoking              | Never vs. Ever    | 2.56                | 1.98-3.33 | <0.001  | 1.73                  | 1.17-2.53  | 0.005   |
| Type                 | ADC vs. non-ADC   | 11.7                | 5.68-29.7 | <0.001  | 6.99                  | 3.35-17.9  | <0.001  |
| EGFR                 | P vs. N           | 0.04                | 0.02-0.08 | <0.001  | 0.02                  | 0.01-0.04  | <0.001  |
| Differentiation      |                   |                     |           |         |                       |            |         |
|                      | Poor vs. well     | 3.31                | 1.33-11.0 | 0.023   | 5.61                  | 2.20-19.1  | 0.001   |
|                      | Poor vs. moderate | 2.02                | 1.36-2.99 | <0.001  | 2.54                  | 1.67-3.86  | <0.001  |
| Pattern <sup>a</sup> |                   |                     |           |         |                       |            |         |
| vs. acinar           | Lepidic           | 0.56                | 0.03-2.71 | 0.576   | 0.53                  | 0.03-2.56  | 0.533   |
|                      | Papillary         | 1.44                | 0.61-3.05 | 0.371   | 1.40                  | 0.59-3.01  | 0.409   |
|                      | Micropapillary    | 1.07                | 0.06-5.27 | 0.950   | 1.00                  | 0.06-5.07  | 0.997   |
|                      | Cribriform        | 23.9                | 5.67-94.8 | <0.001  | 22.9                  | 5.15-97.1  | <0.001  |
|                      | Solid             | 2.73                | 1.40-5.11 | 0.002   | 2.96                  | 1.48-5.74  | 0.002   |
| Signet ring cell     | P vs. N           | 22.7                | 6.91-74.6 | <0.001  | 20.3                  | 5.98-5.98  | <0.001  |
| Vascular invasion    | P vs. N           | 2.65                | 1.25-5.12 | 0.006   | 3.85                  | 1.76-7.71  | <0.001  |
| Lymphatic invasion   | P vs. N           | 2.03                | 1.22-3.34 | 0.006   | 2.13                  | 1.27-3.55  | 0.004   |
| Perineural invasion  | P vs. N           | 1.83                | 0.69-4.02 | 0.170   | 2.96                  | 1.08-6.85  | 0.019   |
| N stage              |                   |                     |           |         |                       |            |         |
| vs. 0                | 1                 | 1.05                | 0.42-2.26 | 0.911   | 1.41                  | 0.56-3.10  | 0.429   |
|                      | 2                 | 3.84                | 2.28-6.45 | <0.001  | 3.95                  | 2.30-6.73  | <0.001  |
|                      | 3                 | 5.04                | 0.78-18.7 | 0.036   | 4.76                  | 0.71-18.78 | 0.049   |

a: Analysis is performed on tumors with adenocarcinoma histology only

OR: odds ratio, CI: confidence interval of odds ratio, M: male, F: female, ADC: adenocarcinoma, SqCC: squamous cell carcinoma, SCC: small cell carcinoma, LCNEC: large cell neuroendocrine carcinoma, N: negative, P: positive

Supplementary Table S9: Patients having two or more primary lung tumors

|      | Age | Sex | Smoking | Site | Histologic type         | T stage | N stage |   | EGFR                    | KRAS | ALK |
|------|-----|-----|---------|------|-------------------------|---------|---------|---|-------------------------|------|-----|
| DP01 | 68  | M   | Never   | RUL  | Adenocarcinoma          | 1a      | 0       | P | p.E746_<br>A750del      | N    | N   |
| DP01 | 71  | M   | Never   | LLL  | Adenocarcinoma          | 1a      | 2       | P | p.L861Q                 | N    | N   |
| DP02 | 79  | F   | Never   | RUL  | Adenocarcinoma          | 2a      | 0       | P | p.L858R                 | N    | N   |
| DP02 | 79  | F   | Never   | RLL  | Adenocarcinoma          | 1a      | 0       | N |                         | ND   | N   |
| DP03 | 46  | M   | Never   | RLL  | Adenocarcinoma          | 1a      | 0       | P | p.R776H                 | N    | N   |
| DP03 | 49  | M   | Never   | LLL  | Adenocarcinoma          | 1a      | 0       | P | p.L858R                 | N    | N   |
| DP03 | 49  | M   | Never   | RLL  | Adenocarcinoma          | 1       | 0       | P | p.G719C                 | N    | N   |
| DP04 | 60  | M   | Former  | LUL  | Adenocarcinoma          | 1a      | 0       | P | p.E746_<br>A750del      | N    | N   |
| DP04 | 62  | M   | Former  | RUL  | Adenocarcinoma          | 1a      | 0       | P | p.L747_<br>P753delinsS  | N    | N   |
| DP05 | 70  | F   | Never   | LLL  | Adenocarcinoma          | 1b      | 0       | P | p.H773_<br>V774delinsLM | N    | N   |
| DP05 | 70  | F   | Never   | RML  | Adenocarcinoma          | 1a      | 0       | N |                         | N    | N   |
| DP06 | 61  | M   | Former  | RUL  | Adenocarcinoma          | 1a      | 0       | N |                         | N    | N   |
| DP06 | 61  | M   | Former  | LUL  | Adenocarcinoma          | 1a      | 0       | N |                         | P    | N   |
| DP07 | 77  | M   | Former  | LUL  | Adenocarcinoma          | 1a      | 0       | N |                         | N    | N   |
| DP07 | 77  | M   | Former  | RLL  | Squamous cell carcinoma | 2b      | 0       | N |                         | N    | N   |
| DP08 | 72  | F   | Never   | LLL  | Adenocarcinoma          | 1a      | 0       | P | p.E746_<br>A750del      | N    | N   |
| DP08 | 72  | F   | Never   | RML  | Adenocarcinoma          | 1a      | 0       | P | p.N771_<br>H773dup      | N    | N   |
| DP09 | 61  | F   | Never   | LLL  | Adenocarcinoma          | 2a      | 2       | N |                         | N    | P   |
| DP09 | 61  | F   | Never   | RLL  | Adenocarcinoma          | 1a      | 0       | P | p.L858R                 | N    | N   |
| DP10 | 70  | M   | Former  | RLL  | Adenocarcinoma          | 2       | 0       | N |                         | N    | N   |
| DP10 | 72  | M   | Former  | LLL  | Adenocarcinoma          | 1a      | 0       | N |                         | N    | N   |
| DP11 | 74  | F   | Never   | RUL  | Adenocarcinoma          | 2a      | 0       | N |                         | ND   | N   |
| DP11 | 74  | F   | Never   | LLL  | Adenocarcinoma          | 2a      | 0       | P | exon 19<br>deletion     | ND   | N   |

M: male, F: female, RUL: right upper lobe, RML: right middle lobe, RLL: right lower lobe, LUL: left upper lobe, LLL: left lower lobe, P: positive, N: negative, ND: test not done
